# Supplementary material
Source: JCI journal article supplement (doi:10.1172/jci128269)

## Supplemental Data

Supplemental Table 1. Sources of 30 human E2 siGENOME SMARTpool siRNA library screen

| Dharmacon siGENOME® SMARTpool® siRNA Library- Human Ubiquitin Conjugating Enzymes |         |      |             |        |                |                      |
|-----------------------------------------------------------------------------------|---------|------|-------------|--------|----------------|----------------------|
| G-015562 Lot 15221                                                                |         |      |             |        |                |                      |
| Order Number                                                                      | Plate   | Well | Gene Symbol | GENEID | Gene Accession | Sequence             |
| CTM-463745                                                                        | Plate 1 | A02  | UBE2A       | 7319   | NM_001282161   | GAACAAAGCUGGCGUGAUU  |
| CTM-463746                                                                        | Plate 1 | A02  | UBE2A       | 7319   | NM_001282161   | GAACAAACGGGAAUAUGAA  |
| CTM-463747                                                                        | Plate 1 | A02  | UBE2A       | 7319   | NM_001282161   | CAGGAGAACAAACGGGAAU  |
| CTM-463748                                                                        | Plate 1 | A02  | UBE2A       | 7319   | NM_001282161   | CUAUGCAGAUGGUAGUAUA  |
| CTM-463759                                                                        | Plate 1 | A03  | UBE2B       | 7320   | NM_003337      | GAACAAAGCUGGAAUGAUU  |
| CTM-463760                                                                        | Plate 1 | A03  | UBE2B       | 7320   | NM_003337      | CAAACGAGAAUAUGAGAAA  |
| CTM-463761                                                                        | Plate 1 | A03  | UBE2B       | 7320   | NM_003337      | GGAAAAACAAACGAGAAUAU |
| CTM-463762                                                                        | Plate 1 | A03  | UBE2B       | 7320   | NM_003337      | AGUUUAUUUGGACCAGAA   |
| CTM-463763                                                                        | Plate 1 | A04  | UBE2C       | 11065  | NM_001281742   | CAACAUUGAUAGUCCCUUG  |
| CTM-463764                                                                        | Plate 1 | A04  | UBE2C       | 11065  | NM_001281742   | AACCCAACAUUGAUAGUCC  |
| CTM-463765                                                                        | Plate 1 | A04  | UBE2C       | 11065  | NM_001281742   | CCCAACAUUGAUAGUCCCU  |
| CTM-463766                                                                        | Plate 1 | A05  | UBE2D1      | 7321   | NM_003338      | GAGAAUGGACUCAGAAAUA  |
| CTM-463767                                                                        | Plate 1 | A05  | UBE2D1      | 7321   | NM_003338      | CAACAGACAUGCAAGAGAA  |
| CTM-463768                                                                        | Plate 1 | A05  | UBE2D1      | 7321   | NM_003338      | GGAAGUAUUUGUCUCGAAU  |
| CTM-463769                                                                        | Plate 1 | A05  | UBE2D1      | 7321   | NM_003338      | CAUAAACAGUAAUGGAAGU  |
| CTM-463770                                                                        | Plate 1 | A06  | UBE2D2      | 7322   | NM_003339      | GGGAAUGGACUCAGAAGUA  |
| CTM-463771                                                                        | Plate 1 | A06  | UBE2D2      | 7322   | NM_003339      | GAGAAAAGUACAACAGAAU  |
| CTM-463772                                                                        | Plate 1 | A06  | UBE2D2      | 7322   | NM_003339      | CUAUCAGGGUGGAGUAUUU  |
| CTM-463773                                                                        | Plate 1 | A06  | UBE2D2      | 7322   | NM_003339      | CAACAGAAUAGCUCGGGAA  |
| CTM-463774                                                                        | Plate 1 | A07  | UBE2E1      | 7324   | NM_001202476   | GCUUGGACAUUUUGAAAGA  |
| CTM-463775                                                                        | Plate 1 | A07  | UBE2E1      | 7324   | NM_001202476   | GGACAAGAAUCUAUCAUUG  |
| CTM-463776                                                                        | Plate 1 | A07  | UBE2E1      | 7324   | NM_001202476   | CCAAAGGCGAUAAACAUUA  |
| CTM-463777                                                                        | Plate 1 | A07  | UBE2E1      | 7324   | NM_001202476   | GCGAUAAACAUUAUGAAUG  |
| CTM-463778                                                                        | Plate 1 | A08  | UBE2E2      | 7325   | NM_152653      | GCAAGAACCAGAAAGAGAA  |
| CTM-463779                                                                        | Plate 1 | A08  | UBE2E2      | 7325   | NM_152653      | AGAAGGAACUUGCAGAAAU  |
| CTM-463780                                                                        | Plate 1 | A08  | UBE2E2      | 7325   | NM_152653      | ACAAAGAGUUGAUGACAGU  |
| CTM-463781                                                                        | Plate 1 | A08  | UBE2E2      | 7325   | NM_152653      | CGAUGGAGAUCAACGUGAA  |
| CTM-463782                                                                        | Plate 1 | A09  | UBE2F       | 140739 | NM_001278306   | GGAAUAAAGUGGAUGACUA  |
| CTM-463783                                                                        | Plate 1 | A09  | UBE2F       | 140739 | NM_001278306   | GGGAAUAUGUCUGAGUUU   |
| CTM-463784                                                                        | Plate 1 | A09  | UBE2F       | 140739 | NM_001278306   | GGAAUAUGUCUGAGUUUA   |
| CTM-463785                                                                        | Plate 1 | A09  | UBE2F       | 140739 | NM_001278306   | CAUCAAACGUUAUGCCAGA  |
| CTM-463786                                                                        | Plate 1 | A10  | UBE2G1      | 7326   | NM_003342      | GGGAAGAUAGUAUGGUUA   |
| CTM-463787                                                                        | Plate 1 | A10  | UBE2G1      | 7326   | NM_003342      | GCGAAAGAAUGGAGGGGAA  |
| CTM-463788                                                                        | Plate 1 | A10  | UBE2G1      | 7326   | NM_003342      | GCACCCAAAUGUUGAUAAA  |
| CTM-463789                                                                        | Plate 1 | A10  | UBE2G1      | 7326   | NM_003342      | GGAAGAUAGAAUUGGAGAA  |
| CTM-463792                                                                        | Plate 1 | A11  | UBE2G2      | 7327   | NM_001202489   | UGACGAAAGUGGAGCUAAC  |
| CTM-463793                                                                        | Plate 1 | A11  | UBE2G2      | 7327   | NM_001202489   | GAGAUUUACCUGUGAGAUG  |
| CTM-463794                                                                        | Plate 1 | A11  | UBE2G2      | 7327   | NM_001202489   | GCGAUGACCCCAUGGGCUA  |
| CTM-463795                                                                        | Plate 1 | A11  | UBE2G2      | 7327   | NM_001202489   | GGGAGCAGUUCUAUUAAGU  |
| CTM-463797                                                                        | Plate 1 | B02  | UBE2H       | 7328   | NM_001202498   | AAGAGUACAUCAGAAAUA   |
| CTM-463798                                                                        | Plate 1 | B02  | UBE2H       | 7328   | NM_001202498   | CAGAAGAAUACAAGCAGAA  |
| CTM-463799                                                                        | Plate 1 | B02  | UBE2H       | 7328   | NM_001202498   | CGGAGGAGGCGCUGAAAGA  |
| CTM-463800                                                                        | Plate 1 | B02  | UBE2H       | 7328   | NM_001202498   | AAGAUGAGGCCAGGAUUA   |

|            |         |     |        |       |              |                      |
|------------|---------|-----|--------|-------|--------------|----------------------|
| CTM-463802 | Plate 1 | B03 | UBE2I  | 7329  | NM_194261    | GAGGAAAGCAUGGAGGAAA  |
| CTM-463803 | Plate 1 | B03 | UBE2I  | 7329  | NM_194261    | GGGAAGGAGGCUUGUUUAA  |
| CTM-463804 | Plate 1 | B03 | UBE2I  | 7329  | NM_194261    | CCAUCUUAGAGGAGGACAA  |
| CTM-463805 | Plate 1 | B03 | UBE2I  | 7329  | NM_194261    | AGGAAAGCAUGGAGGAAAG  |
| CTM-463806 | Plate 1 | B04 | UBE2J1 | 51465 | NM_016021    | GAGUAUAAGGACAGCAUUA  |
| CTM-463807 | Plate 1 | B04 | UBE2J1 | 51465 | NM_181893    | UGAAAGAAGCGGCAGAAUU  |
| CTM-463808 | Plate 1 | B04 | UBE2J1 | 51465 | NM_181893    | CAGCCUUCGUGGAGUAUAA  |
| CTM-463809 | Plate 1 | B04 | UBE2J1 | 51465 | NM_181893    | CAAAGAAGCUGGCUAGGCA  |
| CTM-464269 | Plate 1 | B05 | UBE2K  | 3093  | NM_001312646 | GGAUGUAGAGACUGCAACA  |
| CTM-464270 | Plate 1 | B05 | UBE2K  | 3093  | NM_001312646 | UGUAGAGACUGCAACAGAA  |
| CTM-464271 | Plate 1 | B05 | UBE2K  | 3093  | NM_001312646 | GUAGAGACUGCAACAGAAU  |
| CTM-464272 | Plate 1 | B05 | UBE2K  | 3093  | NM_001312646 | AUGCAGUAAUAGUGGCCUU  |
| CTM-463810 | Plate 1 | B06 | UBE2L3 | 7332  | NM_001256356 | CCUUCAGAAUCGAAAUCAA  |
| CTM-463811 | Plate 1 | B06 | UBE2L3 | 7332  | NM_001256356 | CCACCGAAGAUCAAUUUA   |
| CTM-463812 | Plate 1 | B06 | UBE2L3 | 7332  | NM_001256356 | ACCCAAACUAGCAGAAAA   |
| CTM-463813 | Plate 1 | B06 | UBE2L3 | 7332  | NM_001256356 | GCCAGUAAUAGUGCCGAA   |
| CTM-463814 | Plate 1 | B07 | UBE2L6 | 9246  | NM_004223    | GGACGAGAACGGACAGAUU  |
| CTM-464093 | Plate 1 | B07 | UBE2L6 | 9246  | NM_004223    | GUGAAUAGACCGAAUUAUCA |
| CTM-464094 | Plate 1 | B07 | UBE2L6 | 9246  | NM_004223    | GAAAGAAUGCCGAAGAGUU  |
| CTM-464095 | Plate 1 | B07 | UBE2L6 | 9246  | NM_004223    | AGUGAGAACUGGAAGCCUU  |
| CTM-464101 | Plate 1 | B08 | UBE2M  | 9040  | NM_003969    | CAGAGGUCCUGCAGAACAA  |
| CTM-464102 | Plate 1 | B08 | UBE2M  | 9040  | NM_003969    | GGAAGUUUGUGUUCAGUUU  |
| CTM-464103 | Plate 1 | B08 | UBE2M  | 9040  | NM_003969    | CCGAGGACCCACUGAACAA  |
| CTM-464104 | Plate 1 | B08 | UBE2M  | 9040  | NM_003969    | AGGUGAAGUGUGAGACAAU  |
| CTM-464105 | Plate 1 | B09 | UBE2N  | 7334  | NM_003348    | GGCUAUUUGCCAUGAAUAA  |
| CTM-464106 | Plate 1 | B09 | UBE2N  | 7334  | NM_003348    | AGACAAGUUGGAAGAAUA   |
| CTM-464107 | Plate 1 | B09 | UBE2N  | 7334  | NM_003348    | CCGAACCAGAUAGAGACAA  |
| CTM-464108 | Plate 1 | B09 | UBE2N  | 7334  | NM_003348    | GCAUCAAAAGCCGAACCAGA |
| CTM-464109 | Plate 1 | B10 | UBE2O  | 63893 | NM_022066    | CAAAGAAGCGGAGAAAGA   |
| CTM-464110 | Plate 1 | B10 | UBE2O  | 63893 | NM_022066    | UCAAGAAGCUACAGGAAAA  |
| CTM-464111 | Plate 1 | B10 | UBE2O  | 63893 | NM_022066    | CAACAUAGAGUCUGAGAUU  |
| CTM-464112 | Plate 1 | B10 | UBE2O  | 63893 | NM_022066    | CACAAGAGGAAGAAGAAUA  |
| CTM-464118 | Plate 1 | B11 | UBE2Q1 | 55585 | NM_017582    | GGACAUAAAAGAAAGGAAU  |
| CTM-464119 | Plate 1 | B11 | UBE2Q1 | 55585 | NM_017582    | CAGUCGAACUCGUGAAUGA  |
| CTM-464120 | Plate 1 | B11 | UBE2Q1 | 55585 | NM_017582    | CAGAAGACUUGAUACUA    |
| CTM-464121 | Plate 1 | B11 | UBE2Q1 | 55585 | NM_017582    | CCAUAGAGUCAGUGAUCAU  |
| CTM-464123 | Plate 1 | C02 | UBE2Q2 | 92912 | NM_001145335 | AGAGAUGGCUGAAGAUUA   |
| CTM-464124 | Plate 1 | C02 | UBE2Q2 | 92912 | NM_001145335 | CAGAAGAAGAGGAAGAAGA  |
| CTM-464125 | Plate 1 | C02 | UBE2Q2 | 92912 | NM_001145335 | AGUCAGAGGAUGAAGGAAU  |
| CTM-464126 | Plate 1 | C02 | UBE2Q2 | 92912 | NM_001145335 | AGAAGAAGAGGAAGAAGAA  |
| CTM-464243 | Plate 1 | C03 | UBE2R1 | 997   | NM_004359    | GGAAGUGGAAAGAGAGCAA  |
| CTM-464244 | Plate 1 | C03 | UBE2R1 | 997   | NM_004359    | GGAAAGAGAGCAAGGGGAA  |
| CTM-464245 | Plate 1 | C03 | UBE2R1 | 997   | NM_004359    | GCGUGACACUGGUGGACGA  |
| CTM-464246 | Plate 1 | C03 | UBE2R1 | 997   | NM_004359    | ACGCAGAACGUCAGGACCA  |
| CTM-464247 | Plate 1 | C04 | UBE2R2 | 54926 | NM_017811    | CCACAACCCUGGCGAAUA   |
| CTM-464248 | Plate 1 | C04 | UBE2R2 | 54926 | NM_017811    | CGACAUUGAUGAUGAAGAU  |
| CTM-464249 | Plate 1 | C04 | UBE2R2 | 54926 | NM_017811    | CCACUAAGGCCGAAGCAGA  |
| CTM-464250 | Plate 1 | C04 | UBE2R2 | 54926 | NM_017811    | AAGAUGAGGAGGAGGAAGA  |
| CTM-464251 | Plate 1 | C05 | UBE2S  | 27338 | NM_014501    | GCAUCAAGGUCUUUCCCAA  |
| CTM-464252 | Plate 1 | C05 | UBE2S  | 27338 | NM_014501    | UCAACGUGCUCAGAGGGA   |
| CTM-464253 | Plate 1 | C05 | UBE2S  | 27338 | NM_014501    | AGGGCUACUUCUGACCAA   |
| CTM-464254 | Plate 1 | C05 | UBE2S  | 27338 | NM_014501    | ACAAGGAGGUGACGACACU  |
| CTM-464255 | Plate 1 | C06 | UBE2T  | 29089 | NM_014176    | CAACACACCUUAUGAGAAA  |
| CTM-464256 | Plate 1 | C06 | UBE2T  | 29089 | NM_014176    | AGGAAGAGAUGCUUGAUAA  |
| CTM-464257 | Plate 1 | C06 | UBE2T  | 29089 | NM_014176    | UGACAUAUCCUCAGAAUUU  |
| CTM-464258 | Plate 1 | C06 | UBE2T  | 29089 | NM_014176    | ACAAAAGGCUGAUGAGGAA  |

|            |         |     |        |        |              |                      |
|------------|---------|-----|--------|--------|--------------|----------------------|
| CTM-464259 | Plate 1 | C07 | UBE2U  | 148581 | NM_001366234 | CAUCAGAAAGAAUGGAAUU  |
| CTM-464260 | Plate 1 | C07 | UBE2U  | 148581 | NM_001366234 | CAGUAUUACAAAUGGAAGA  |
| CTM-464261 | Plate 1 | C07 | UBE2U  | 148581 | NM_001366234 | GCUCAAAGUUCCAAUUUUC  |
| CTM-464262 | Plate 1 | C07 | UBE2U  | 148581 | NM_001366234 | GGAUCUACAGCAUCAGAAA  |
| CTM-464265 | Plate 1 | C08 | UBE2V2 | 7336   | NM_003350    | GGACAAACAUAACAACAAUU |
| CTM-464266 | Plate 1 | C08 | UBE2V2 | 7336   | NM_003350    | CUAAUGAUGUCCAAAGAAA  |
| CTM-464267 | Plate 1 | C08 | UBE2V2 | 7336   | NM_003350    | GGAAGAACUUGAAGAAGGA  |
| CTM-464268 | Plate 1 | C08 | UBE2V2 | 7336   | NM_003350    | CAGAAUAUAUAGCCUGAAA  |
| CTM-464270 | Plate 1 | C09 | UBE2W  | 55284  | NM_001271015 | GGAAUGACCUUAAAUGAGA  |
| CTM-464271 | Plate 1 | C09 | UBE2W  | 55284  | NM_001271015 | GGUCAUGUUUACUGGUGAA  |
| CTM-464272 | Plate 1 | C09 | UBE2W  | 55284  | NM_001271015 | CCUAAAUGAGAAGAGUGU   |
| CTM-464273 | Plate 1 | C09 | UBE2W  | 55284  | NM_001271015 | GCGAACAUGUAACAAGAAU  |
| CTM-464279 | Plate 1 | C10 | UBE2Z  | 65264  | NM_023079    | GUGACAUGAUGGAAGGAAA  |
| CTM-464280 | Plate 1 | C10 | UBE2Z  | 65264  | NM_023079    | GCUUUGAACAGGAGAGACA  |
| CTM-464281 | Plate 1 | C10 | UBE2Z  | 65264  | NM_023079    | GCAAUAACACAGUGAGGUU  |
| CTM-464282 | Plate 1 | C10 | UBE2Z  | 65264  | NM_023079    | GGGAAAGCUGCUUGAGUA   |
| CTM-464283 | Plate 1 | C11 | BIRC6  | 57448  | NM_016252    | AAAUAAAGCUCCAGGAUUA  |
| CTM-464284 | Plate 1 | C11 | BIRC6  | 57448  | NM_016252    | CGGAAGAUGUUGAGUGAAA  |
| CTM-464285 | Plate 1 | C11 | BIRC6  | 57448  | NM_016252    | GUGAAAAGACAAAGGAAAA  |
| CTM-464286 | Plate 1 | C11 | BIRC6  | 57448  | NM_016252    | AAGUAGAGCCUUGAAUUA   |

## Supplemental Table 2. Sources of 30 mouse E2 siGENOME SMARTpool siRNA library screen

| Dharmacon siGENOME® SMARTpool® siRNA Library- Mouse Ubiquitin Conjugating Enzymes |         |      |               |        |                |                     |
|-----------------------------------------------------------------------------------|---------|------|---------------|--------|----------------|---------------------|
| G-014124 Lot 12783                                                                |         |      |               |        |                |                     |
| Order Number                                                                      | Plate   | Well | Gene Symbol   | GENEID | Gene Accession | Sequence            |
| CTM-464291                                                                        | Plate 1 | A02  | <i>Ube2a</i>  | 22209  | NM_001313696   | GAACAAAGCUGGCGCGACU |
| CTM-464292                                                                        | Plate 1 | A02  | <i>Ube2a</i>  | 22209  | NM_001313696   | CAGGAGAACAAGCGGGAAU |
| CTM-464293                                                                        | Plate 1 | A02  | <i>Ube2a</i>  | 22209  | NM_001313696   | CAACAUAAUGGUUUGGAAU |
| CTM-464294                                                                        | Plate 1 | A02  | <i>Ube2a</i>  | 22209  | NM_001313696   | GGUAGUAUAUGUCUGGAUA |
| CTM-464295                                                                        | Plate 1 | A03  | <i>Ube2b</i>  | 22210  | NM_001362686   | GAGCAAAGCUGGAAUGAUU |
| CTM-464296                                                                        | Plate 1 | A03  | <i>Ube2b</i>  | 22210  | NM_001362686   | GAGUAUGAGAAGAGAGUUU |
| CTM-464297                                                                        | Plate 1 | A03  | <i>Ube2b</i>  | 22210  | NM_001362686   | GUUUAGAUAUCCUGCAGAA |
| CTM-464298                                                                        | Plate 1 | A03  | <i>Ube2b</i>  | 22210  | NM_001362686   | AGUUUAUUUUGGACCAGAA |
| CTM-464299                                                                        | Plate 1 | A04  | <i>Ube2c</i>  | 68612  | NM_026785      | AAGAAAUACCUGCAAGAAA |
| CTM-464300                                                                        | Plate 1 | A04  | <i>Ube2c</i>  | 68612  | NM_026785      | CAUGACAUCUGGUGACAAA |
| CTM-464301                                                                        | Plate 1 | A04  | <i>Ube2c</i>  | 68612  | NM_026785      | CUAUAUGAUGUCAGGACUA |
| CTM-464302                                                                        | Plate 1 | A04  | <i>Ube2c</i>  | 68612  | NM_026785      | AGAAAUACCUGCAAGAAAC |
| CTM-464303                                                                        | Plate 1 | A05  | <i>Ube2d1</i> | 216080 | NM_145420      | GAGAAUGGACUCAGAAAUA |
| CTM-464304                                                                        | Plate 1 | A05  | <i>Ube2d1</i> | 216080 | NM_145420      | CCAGAAAGAAUUAAGUGAU |
| CTM-464305                                                                        | Plate 1 | A05  | <i>Ube2d1</i> | 216080 | NM_145420      | ACCCAAAUAUAAACAGCAA |
| CTM-464306                                                                        | Plate 1 | A05  | <i>Ube2d1</i> | 216080 | NM_145420      | CGCUUUGACUGUAUCGAAA |
| CTM-464307                                                                        | Plate 1 | A06  | <i>Ube2d2</i> | 641452 | NM_001037292   | GGGAAUGGACUCAGAAGUA |
| CTM-464308                                                                        | Plate 1 | A06  | <i>Ube2d2</i> | 641452 | NM_001037292   | GAGAAAAGUACAACAGAAU |
| CTM-464309                                                                        | Plate 1 | A06  | <i>Ube2d2</i> | 641452 | NM_001037292   | CUAUCAGGGUGGAGUAUUU |
| CTM-464310                                                                        | Plate 1 | A06  | <i>Ube2d2</i> | 641452 | NM_001037292   | CAACAGAAUAGCUCGGGAA |
| CTM-464311                                                                        | Plate 1 | A07  | <i>Ube2e1</i> | 22194  | NM_009455      | GAGCAGAACACGACAGAAU |
| CTM-464312                                                                        | Plate 1 | A07  | <i>Ube2e1</i> | 22194  | NM_009455      | GCUUGGACAUAUUGAAAGA |
| CTM-464313                                                                        | Plate 1 | A07  | <i>Ube2e1</i> | 22194  | NM_009455      | AUUAUAGCCAAGGAGUUA  |

|            |         |     |               |        |              |                     |
|------------|---------|-----|---------------|--------|--------------|---------------------|
| CTM-464314 | Plate 1 | A07 | <i>Ube2e1</i> | 22194  | NM_009455    | GACAGUGGACCAAGAGUAU |
| CTM-464315 | Plate 1 | A08 | <i>Ube2e2</i> | 218793 | NM_001360327 | CCAAAGGAGACAACAUUUA |
| CTM-464316 | Plate 1 | A08 | <i>Ube2e2</i> | 218793 | NM_001360327 | GAAUGGAGGUCAACUAUUA |
| CTM-464317 | Plate 1 | A08 | <i>Ube2e2</i> | 218793 | NM_001360327 | CCACACAGUACAUGACCAA |
| CTM-464318 | Plate 1 | A08 | <i>Ube2e2</i> | 218793 | NM_001360327 | CCAACAGAGCGGAGCAUGA |
| CTM-464319 | Plate 1 | A09 | <i>Ube2f</i>  | 67921  | NM_001355762 | GGGACAAAGUGGAUGAAUA |
| CTM-464320 | Plate 1 | A09 | <i>Ube2f</i>  | 67921  | NM_001356595 | UUGCAGAACUUGAAGCUAA |
| CTM-464321 | Plate 1 | A09 | <i>Ube2f</i>  | 67921  | NM_001356595 | GUGAAAUGCUUGACUAAAA |
| CTM-464322 | Plate 1 | A09 | <i>Ube2f</i>  | 67921  | NM_001356595 | GAACAUCAUUGCGGGACA  |
| CTM-464323 | Plate 1 | A10 | <i>Ube2g1</i> | 67128  | NM_025985    | AGACAGAAACGGAGAAUUU |
| CTM-464324 | Plate 1 | A10 | <i>Ube2g1</i> | 67128  | NM_025985    | GCGAAAGAAUGGAGGGAG  |
| CTM-464325 | Plate 1 | A10 | <i>Ube2g1</i> | 67128  | NM_025985    | GCACCCAAAUGUUGAUAAA |
| CTM-464326 | Plate 1 | A10 | <i>Ube2g1</i> | 67128  | NM_025985    | AAAUGUAGAUGCUGCGAAA |
| CTM-464327 | Plate 1 | A11 | <i>Ube2g2</i> | 22213  | NM_019803    | CCAUGAAUGAAGAGAAUUU |
| CTM-464328 | Plate 1 | A11 | <i>Ube2g2</i> | 22213  | NM_019803    | GUGAUGAUCCCAUGGGUUA |
| CTM-464329 | Plate 1 | A11 | <i>Ube2g2</i> | 22213  | NM_019803    | GGCUGAUGGCCGAGUAUAA |
| CTM-464330 | Plate 1 | A11 | <i>Ube2g2</i> | 22213  | NM_019803    | CGAUGAGAGUGGAGCAAAC |
| CTM-464331 | Plate 1 | B02 | <i>Ube2h</i>  | 22214  | NM_001169577 | CAGAAGAGUACAAGCAGAA |
| CTM-464332 | Plate 1 | B02 | <i>Ube2h</i>  | 22214  | NM_001169577 | CGGAAGAGGCCUGAAGGA  |
| CTM-464333 | Plate 1 | B02 | <i>Ube2h</i>  | 22214  | NM_001169577 | AAGAGUACAUCCAGAAGUA |
| CTM-464334 | Plate 1 | B02 | <i>Ube2h</i>  | 22214  | NM_001169577 | CCAGAAGAGUACAAGCAGA |
| CTM-464335 | Plate 1 | B03 | <i>Ube2i</i>  | 22219  | NM_001177610 | GCACAAUGAACCUAUGAUA |
| CTM-464336 | Plate 1 | B03 | <i>Ube2i</i>  | 22219  | NM_001177610 | CAGAGUGGAAUAUGAGAAA |
| CTM-464337 | Plate 1 | B03 | <i>Ube2i</i>  | 22219  | NM_001177610 | GGGAAGGAGGCUUGUUCAA |
| CTM-464338 | Plate 1 | B03 | <i>Ube2i</i>  | 22219  | NM_001177610 | GCCAAAACAGAGUGGAAUA |
| CTM-464339 | Plate 1 | B04 | <i>Ube2j1</i> | 56228  | NM_001355494 | GAAAGAAGCUGCAGAAUUG |
| CTM-464340 | Plate 1 | B04 | <i>Ube2j1</i> | 56228  | NM_001355494 | UGAAAGAAGCUGCAGAAUU |
| CTM-464341 | Plate 1 | B04 | <i>Ube2j1</i> | 56228  | NM_001355494 | GCUAACAGCUAAUGGACGA |
| CTM-464342 | Plate 1 | B04 | <i>Ube2j1</i> | 56228  | NM_001355494 | GAAUAUAUCUGGCCAAUGA |
| CTM-464343 | Plate 1 | B05 | <i>Ube2k</i>  | 53323  | NM_001310618 | UGAUAGGAACGCAGUAAUA |
| CTM-464344 | Plate 1 | B05 | <i>Ube2k</i>  | 53323  | NM_001310618 | GCGAAUCAGUACAAACAGA |
| CTM-464345 | Plate 1 | B05 | <i>Ube2k</i>  | 53323  | NM_001310618 | AUGCAGUAGUAGCGAAUCA |
| CTM-464346 | Plate 1 | B05 | <i>Ube2k</i>  | 53323  | NM_001310618 | ACGCAGUAAUAGUGGCCUU |
| CTM-464347 | Plate 1 | B06 | <i>Ube2l3</i> | 22195  | NM_009456    | UAAGAAUGCUGAAGAGUUU |
| CTM-464348 | Plate 1 | B06 | <i>Ube2l3</i> | 22195  | NM_009456    | GCUGAAGAGUUUACAAAGA |
| CTM-464349 | Plate 1 | B06 | <i>Ube2l3</i> | 22195  | NM_009456    | CUGAAGAGUUUACAAAGAA |
| CTM-464350 | Plate 1 | B06 | <i>Ube2l3</i> | 22195  | NM_009456    | ACAAAGAAAUAUGGGGAAA |
| CTM-464351 | Plate 1 | B07 | <i>Ube2l6</i> | 56791  | NM_019949    | CGAAAGAGCUGGAGAGUCU |
| CTM-464352 | Plate 1 | B07 | <i>Ube2l6</i> | 56791  | NM_019949    | UCAAUGUCUGGUGAGUAA  |
| CTM-464353 | Plate 1 | B07 | <i>Ube2l6</i> | 56791  | NM_019949    | GGAAGAAGGCAGAAGAGUU |
| CTM-464354 | Plate 1 | B07 | <i>Ube2l6</i> | 56791  | NM_019949    | CCGGAGAUGUUCAGGAAGA |
| CTM-464358 | Plate 1 | B08 | <i>Ube2m</i>  | 22192  | NM_001243968 | CUGAGGUCCUGCAGAACAA |
| CTM-464359 | Plate 1 | B08 | <i>Ube2m</i>  | 22192  | NM_001243968 | CUGAGGACCCACUGAACAA |
| CTM-464360 | Plate 1 | B08 | <i>Ube2m</i>  | 22192  | NM_001243968 | AGCCAGUCCUUACGAUAAA |
| CTM-464361 | Plate 1 | B08 | <i>Ube2m</i>  | 22192  | NM_001243968 | AAGCCAGUCCUUACGAUAA |
| CTM-464365 | Plate 1 | B09 | <i>Ube2n</i>  | 93765  | NM_080560    | AGACAAGUUGGGAAGAAUA |
| CTM-464366 | Plate 1 | B09 | <i>Ube2n</i>  | 93765  | NM_080560    | GGCUAUAUGCCAUGAACAA |
| CTM-464367 | Plate 1 | B09 | <i>Ube2n</i>  | 93765  | NM_080560    | CUAUAUGCCAUGAACAAUA |
| CTM-464368 | Plate 1 | B09 | <i>Ube2n</i>  | 93765  | NM_080560    | GCAUUAAGCAGAACCAGA  |
| CTM-464369 | Plate 1 | B10 | <i>Ube2o</i>  | 217342 | NM_173755    | CCAAAGAGGAGGAGGAAGA |
| CTM-464370 | Plate 1 | B10 | <i>Ube2o</i>  | 217342 | NM_173755    | UCAAGAAGCUACAGGAGAA |
| CTM-464371 | Plate 1 | B10 | <i>Ube2o</i>  | 217342 | NM_173755    | CCGAAAGCACAGAGGACAA |
| CTM-464372 | Plate 1 | B10 | <i>Ube2o</i>  | 217342 | NM_173755    | GGGACUUCGUGGUGGACAA |
| CTM-464373 | Plate 1 | B11 | <i>Ube2q1</i> | 70093  | NM_027315    | GGACAUAAGAAAGGGAAU  |
| CTM-464374 | Plate 1 | B11 | <i>Ube2q1</i> | 70093  | NM_027315    | GCAAGAAGUCUGAAGAUGA |
| CTM-464375 | Plate 1 | B11 | <i>Ube2q1</i> | 70093  | NM_027315    | CAGAAGACCUAGAUCACUA |

|            |         |     |               |        |              |                      |
|------------|---------|-----|---------------|--------|--------------|----------------------|
| CTM-464376 | Plate 1 | B11 | <i>Ube2q1</i> | 70093  | NM_027315    | CAGUCGAACUCGUGAAUGA  |
| CTM-464612 | Plate 1 | C02 | <i>Ube2q2</i> | 109161 | NM_001346658 | GGAGAUGGCUGAAGAUUA   |
| CTM-464613 | Plate 1 | C02 | <i>Ube2q2</i> | 109161 | NM_001346658 | GCUAAUAAAUGACAGCUUA  |
| CTM-464614 | Plate 1 | C02 | <i>Ube2q2</i> | 109161 | NM_001346658 | CAGGAAGACUCAAGGCAA   |
| CTM-464615 | Plate 1 | C02 | <i>Ube2q2</i> | 109161 | NM_001346658 | ACUAUGAGAUGAAGGAAGA  |
| CTM-464620 | Plate 1 | C03 | <i>Ube2r1</i> | 216150 | NM_001359817 | CCCAAACAUCUAUGAGACA  |
| CTM-464621 | Plate 1 | C03 | <i>Ube2r1</i> | 216150 | NM_001359817 | CCAAGAUGUGGCACCCAAA  |
| CTM-464622 | Plate 1 | C03 | <i>Ube2r1</i> | 216150 | NM_001359817 | ACAACUGGGAGGUGGCCAU  |
| CTM-464623 | Plate 1 | C03 | <i>Ube2r1</i> | 216150 | NM_001359817 | AGACAGGGGACGUGUGCAU  |
| CTM-464630 | Plate 1 | C04 | <i>Ube2r2</i> | 67615  | NM_026275    | UGAUGAAGAUGAAGAGGAA  |
| CTM-464631 | Plate 1 | C04 | <i>Ube2r2</i> | 67615  | NM_026275    | GGAAAUGGAGGGACAGCAA  |
| CTM-464632 | Plate 1 | C04 | <i>Ube2r2</i> | 67615  | NM_026275    | ACUCAGAACGUUAGGACUA  |
| CTM-464633 | Plate 1 | C04 | <i>Ube2r2</i> | 67615  | NM_026275    | CGACAUUGAUGAUGAAGAU  |
| CTM-464781 | Plate 1 | C05 | <i>Ube2s</i>  | 77891  | NM_133777    | GGAGAAUUAUGAAGAGAU   |
| CTM-464782 | Plate 1 | C05 | <i>Ube2s</i>  | 77891  | NM_133777    | CCAAGAAACAUAGCAGGUGA |
| CTM-464783 | Plate 1 | C05 | <i>Ube2s</i>  | 77891  | NM_133777    | GAAACAUGCAGGUGAGCGA  |
| CTM-464784 | Plate 1 | C05 | <i>Ube2s</i>  | 77891  | NM_133777    | AGGGCUACUUCUGACUAA   |
| CTM-464788 | Plate 1 | C06 | <i>Ube2t</i>  | 67196  | NM_001278115 | GGAAGGAUUUGUCUAGAU   |
| CTM-464789 | Plate 1 | C06 | <i>Ube2t</i>  | 67196  | NM_001278115 | AAUACUAGGUGGAGCUAAU  |
| CTM-464790 | Plate 1 | C06 | <i>Ube2t</i>  | 67196  | NM_001278115 | CAUGCAAGACAGAAACAAA  |
| CTM-464791 | Plate 1 | C06 | <i>Ube2t</i>  | 67196  | NM_001278115 | GCUAAUACACCUUAUGAGA  |
| CTM-464793 | Plate 1 | C07 | <i>Ube2u</i>  | 381534 | NM_001033773 | GGAAGAAGAAGAAGAAGAA  |
| CTM-464794 | Plate 1 | C07 | <i>Ube2u</i>  | 381534 | NM_001033773 | AGAAAUGCGUCUACGUUA   |
| CTM-464795 | Plate 1 | C07 | <i>Ube2u</i>  | 381534 | NM_001033773 | AGAAGAAGAAGAAGAAGAA  |
| CTM-464796 | Plate 1 | C07 | <i>Ube2u</i>  | 381534 | NM_001033773 | GGAGGAAGAAGAAGAAGAA  |
| CTM-464797 | Plate 1 | C08 | <i>Ube2v2</i> | 70620  | NM_001159351 | AGUCAUACUUCAAGAGCUA  |
| CTM-464798 | Plate 1 | C08 | <i>Ube2v2</i> | 70620  | NM_001159351 | CUUAUGAUGUCCAAAGAAA  |
| CTM-464799 | Plate 1 | C08 | <i>Ube2v2</i> | 70620  | NM_001159351 | AGGCAUGAUUAUUGGGCCA  |
| CTM-464800 | Plate 1 | C08 | <i>Ube2v2</i> | 70620  | NM_001159351 | GGACAGACGUACAACAACU  |
| CTM-464801 | Plate 1 | C09 | <i>Ube2w</i>  | 66799  | NM_001271016 | AGACAUUGGAAGGUGCACCA |
| CTM-464802 | Plate 1 | C09 | <i>Ube2w</i>  | 66799  | NM_001271016 | AUGCAGAAACGACUACAAA  |
| CTM-464803 | Plate 1 | C09 | <i>Ube2w</i>  | 66799  | NM_001271016 | GAAAAGAGUGUUCAGAAUU  |
| CTM-464804 | Plate 1 | C09 | <i>Ube2w</i>  | 66799  | NM_001271016 | CGUCAAUUGCAGAAACGACU |
| CTM-464805 | Plate 1 | C10 | <i>Ube2z</i>  | 268470 | NM_172300    | CGGACUGAUUCGACAGAAA  |
| CTM-464806 | Plate 1 | C10 | <i>Ube2z</i>  | 268470 | NM_172300    | CGACAGAAAGUGCUGGAAA  |
| CTM-464807 | Plate 1 | C10 | <i>Ube2z</i>  | 268470 | NM_172300    | GCAAUAACACAGUGAGGUU  |
| CTM-464808 | Plate 1 | C10 | <i>Ube2z</i>  | 268470 | NM_172300    | GGGAAAGUCUGCUUGAGUA  |
| CTM-464809 | Plate 1 | C11 | <i>Birc6</i>  | 12211  | NM_007566    | GAACAAAGCUCCAGGCCUA  |
| CTM-464810 | Plate 1 | C11 | <i>Birc6</i>  | 12211  | NM_007566    | CAAAGAAUCUGAUGAGAAA  |
| CTM-464811 | Plate 1 | C11 | <i>Birc6</i>  | 12211  | NM_007566    | GUGAAAAGACAAAGGAAAA  |
| CTM-464812 | Plate 1 | C11 | <i>Birc6</i>  | 12211  | NM_007566    | GGGUAGAAGUUCAGCAAGA  |

Supplemental Table 3. List of RT-qPCR primers used in this study

| RT-qPCR primers used in this study |                         |                           |
|------------------------------------|-------------------------|---------------------------|
| Gene                               | Forward                 | Reverse                   |
| <i>HPRT</i>                        | GCTGCAACGCGCGAA         | CCTGTGGTGGACATAGCAATGATT  |
| <i>Hsp90</i>                       | GTCCGCCGTGTGTTTCATCAT   | GCACTTCTTGACGATGTTCTTGC   |
| <i>18S RNA</i>                     | GTAACCCGTTGAACCCCAT     | CCATCCAATCGGTAGTAGCG      |
| <i>Acaca</i>                       | TGGATCCGCTTACAGAGAGACT  | GCCGGAGCATCTCATTCCG       |
| <i>Acadm</i>                       | AGGGTTTGTGTTTGTGTTGACGG | CCCGCTTTTGTGTTTGTGTTGACGG |

|                 |                         |                          |
|-----------------|-------------------------|--------------------------|
| <i>Acadvl</i>   | CTACTGTGCTTCAGGGACAAC   | CAAAGGACTTCGATTCTGCCC    |
| <i>Acox</i>     | GTGCAGCTCAGAGTCTGTCCAA  | TACTGCTGCGTCTGAAAATCGA   |
| <i>Birc6</i>    | CGCGGGACCATCAAAGTCAT    | GCAGTGTCTAGCAACAAGATCC   |
| <i>Cidea</i>    | TGACATTCATGGGATTGCAGAC  | GGCCAGTTGTGATGACTAAGAC   |
| <i>Cox4i2</i>   | CTGCCCGGAGTCTGGTAATG    | CAGTCAACGTAGGGGGTCATC    |
| <i>Cpt1b</i>    | CGTGCTGCTTTCTTTGTG      | AGTGTTCCGGTGTGAGGC       |
| <i>Cycs</i>     | CCAAATCTCCACGGTCTGTTC   | ATCAGGGTATCCTCTCCCCAG    |
| <i>Dio2</i>     | CAGTGTGGTGACGTCTCCAATC  | TGAACCAAAGTTGACCACCAG    |
| <i>Dgat1</i>    | TCCGTCCAGGGTGGTAGTG     | TGAACAAAGAATCTTGACAGACGA |
| <i>Esrra</i>    | CTCAGCTCTTACCCAAACGC    | CCGCTTGGTGATCTCACACTC    |
| <i>Fasn</i>     | GCTGCGGAAACTTCAGGAAAT   | AGAGACGTGTCACTCCTGGACTT  |
| <i>Mfn1</i>     | CCTACTGCTCCTTCTAACCCA   | AGGGACGCCAATCCTGTGA      |
| <i>Ppara</i>    | AGAGCCCCATCTGTCTCTC     | ACTGGTAGTCTGCAAAACCAAA   |
| <i>Ppargc1a</i> | AAAGGATGCGCTCTCGTTCA    | GGAATATGGTGATCGGGAAC     |
| <i>Prdm16</i>   | CAGCACGGTGAAGCCATTC     | GCGTGCATCCGCTTGTG        |
| <i>Sc12a4</i>   | GTGACTGGAACACTGGTCCTA   | CCAGCCACGTTGCATTGTAG     |
| <i>Sreb1c</i>   | GGAGCCATGGATTGCACATT    | GGCCCGGGAAGTCACTGT       |
| <i>Ube2a</i>    | ATGAGGGACTTCAAGAGGTTACA | TCTGCATAGACGTTAGGATGGA   |
| <i>Ube2b</i>    | AAATAAACCACCAACCGTTAGGT | TCTCTTCTCATACTCCCGTTTGT  |
| <i>Ube2c</i>    | GCAGAGTGCGCTGCTAATC     | CTGGAAGTCGGATCTCGGT      |
| <i>Ube2d1</i>   | CCCGTGGGGAGATGACTTGTTTC | GGATAGTCTGTGCGAAAGTGA    |
| <i>Ube2d2</i>   | ACAAGGAATTGAATGACCTGGC  | CACCCTGATAGGGGCTGTC      |
| <i>Ube2e1</i>   | ATGTCGGATGACGATTGAGG    | GCTCATGCTGACTTTACTCTCC   |
| <i>Ube2e2</i>   | ACTGAGGCGCAGAGAGTTGA    | GCTGAACTTGTCTCGATCAGG    |
| <i>Ube2f</i>    | ACGCTGGCAAGCAAGTTGA     | CCTCATCTGGGCTTACAGTCAG   |
| <i>Ube2g1</i>   | CTGGCAGAACTCAACAAAATCC  | AGATGAGCCTTAAAAACACCACC  |
| <i>Ube2g2</i>   | TGGCCGAGTATAAGCAATTAACC | GGCTCAAGGGGTAGTCAAGT     |
| <i>Ube2h</i>    | GACACGGACGTAGTCAAGCTC   | GTCCACTCTCACTTTCCACAC    |
| <i>Ube2i</i>    | GGAGGAAGGACCACCCTTTTG   | GGATAGCGCACTCCCAGTT      |
| <i>Ube2j1</i>   | ATGGAGACCCGCTACAACCT    | GAGGCTGAGCGTGGTAATGAT    |
| <i>Ube2k</i>    | CAGCGAATCAAGCGGGAGTT    | AGGTCCTGCTATTTCTCCTCTT   |
| <i>Ube2l3</i>   | GAGATCCGCAAATGTGGAATGA  | ACTCTGCTGAAAGTTGATTTCA   |
| <i>Ube2l6</i>   | GTGGCGAAAGAGCTGGAGAG    | GGGGAAATCAATCCGCACTTG    |
| <i>Ube2m</i>    | AACCTGCCCAAGACGTGTG     | AGCTGAATACAACTTGCCACT    |
| <i>Ube2n</i>    | GCTGGCAGAACCAGTTCCT     | TCCCTCAAAGGGGAATCCTG     |
| <i>UBE2O</i>    | AGGTCTACGACTTGAAGAACCA  | ACCACTCGGAACTTGCTCTTG    |
| <i>Ube2o</i>    | CAATGAAGCTGGCTTTGACA    | ACTGAAGTGCTGCCGAATCT     |
| <i>Ube2q1</i>   | CATCACGGAATCATACCCTGC   | GCTGAGGGAGGTTGTAGAGTTT   |
| <i>Ube2q2</i>   | GACAAGAACCACGAGCGATTC   | GTCATCAGAGTCCACAAACCAT   |
| <i>Ube2r1</i>   | GACCTCTTAGTGGATTCCGGG   | CCTGCTCTCGGACTCACG       |
| <i>Ube2r2</i>   | AGAAAGCCCTGATGCTTGAGC   | GTGTTAGGGGGTCCGAAGATG    |

|               |                        |                        |
|---------------|------------------------|------------------------|
| <i>Ube2s</i>  | CAGACCCACCTGATGGCATT   | AGACCTCCAGCATAGGGAGTC  |
| <i>Ube2t</i>  | GTGCTGGCAGGAAAAGGATCA  | ATCGGACCTGTGGAGGTTCAA  |
| <i>Ube2u</i>  | AGACATGGTCTCAGATAGCCAC | CCATTGCACTTGATTCTGCCG  |
| <i>Ube2v2</i> | AGGTGATGGTACTGTTAGCTGG | TTGGTGGCCCAATAATCATGC  |
| <i>Ube2w</i>  | ATGGCGTCAATGCAGAAACGA  | ATGTCTACGATCCACTGCGTG  |
| <i>Ube2z</i>  | GTCCACCTGACTATCCCATCC  | TGGGGTTAAACCTCACTGTGT  |
| <i>Ucp1</i>   | CCTGCCTCTCTCGAAACAA    | TGTAGGCTGCCCAATGAACA   |
| <i>Ucp3</i>   | GAGATGGTGACCTACGACATCA | GCGTTCATGTATCGGGTCTTTA |

## Supplemental Figure Legends

### Supplemental Figure S1. Assessment of energy expenditure in *Ube2o*-deficient mice on chow

(A) PCR genotyping of embryos from an intercross of *Ube2o*<sup>+/-</sup> mice (top). Lysates from *Ube2o*<sup>+/+</sup>, *Ube2o*<sup>+/-</sup> and *Ube2o*<sup>-/-</sup> embryos (E13.5) were subjected to immunoblotting (bottom).

(B) Body weight of 8-week-old male and female *Ube2o*<sup>+/+</sup>, *Ube2o*<sup>+/-</sup> and *Ube2o*<sup>-/-</sup> mice on chow. *n* = 5~7 per group.

(C) Percentage of fat and lean mass of 8-week-old *Ube2o*<sup>+/+</sup>, *Ube2o*<sup>+/-</sup> and *Ube2o*<sup>-/-</sup> mice on chow was determined by EchoMRI. *Ube2o*<sup>+/+</sup> *n* = 35, *Ube2o*<sup>+/-</sup> *n* = 10, *Ube2o*<sup>-/-</sup> *n* = 19.

(D) Oxygen consumption (VO<sub>2</sub>) per kg of lean mass of 8-week-old *Ube2o*<sup>+/+</sup>, *Ube2o*<sup>+/-</sup> and *Ube2o*<sup>-/-</sup> mice on chow was determined in metabolic chambers. *Ube2o*<sup>+/+</sup> *n* = 36, *Ube2o*<sup>+/-</sup> *n* = 10, *Ube2o*<sup>-/-</sup> *n* = 19.

(E) Energy expenditure per kg of lean mass of 8-week-old *Ube2o*<sup>+/+</sup>, *Ube2o*<sup>+/-</sup> and *Ube2o*<sup>-/-</sup> mice on chow was determined in metabolic chambers. *Ube2o*<sup>+/+</sup> *n* = 32, *Ube2o*<sup>+/-</sup> *n* = 10, *Ube2o*<sup>-/-</sup> *n* = 19.

(F) Rectal temperature of 8-week-old *Ube2o*<sup>+/+</sup>, *Ube2o*<sup>+/-</sup> and *Ube2o*<sup>-/-</sup> mice on chow.

*Ube2o*<sup>+/+</sup> *n* = 18, *Ube2o*<sup>+/-</sup> *n* = 12, *Ube2o*<sup>-/-</sup> *n* = 6.

(G) Total RNAs from brown adipose tissue (BAT) of *Ube2o*<sup>+/+</sup> and *Ube2o*<sup>-/-</sup> mice fed an

HFD for 20 weeks were subjected to RT-qPCR. *Ube2o*<sup>+/+</sup> *n* = 9, *Ube2o*<sup>+/-</sup> 12 weeks HFD *n* = 9, *Ube2o*<sup>-/-</sup> *n* = 4.

(H) Total RNAs from tibialis anterior muscles of *Ube2o*<sup>+/+</sup> and *Ube2o*<sup>-/-</sup> mice fed an HFD

for 20 weeks were subjected to RT-qPCR. *Ube2o*<sup>+/+</sup> *n* = 5, *Ube2o*<sup>+/-</sup> 12 weeks HFD *n* = 5, *Ube2o*<sup>-/-</sup> *n* = 10.

(I) Immunohistochemical analysis of succinate dehydrogenase (SDH) (left) and quantification of SDH staining intensity (right) in tibialis anterior muscles of 8-week-old

*Ube2o*<sup>+/+</sup>, *Ube2o*<sup>+/-</sup> and *Ube2o*<sup>-/-</sup> mice on chow. Scale bars, 100  $\mu$ m. *Ube2o*<sup>+/+</sup> *n* = 10, *Ube2o*<sup>+/-</sup> *n* = 5, *Ube2o*<sup>-/-</sup> *n* = 5.

(J) Citrate synthase (CS) activity in quadriceps of 8-week-old *Ube2o*<sup>+/+</sup>, *Ube2o*<sup>+/-</sup> and

*Ube2o*<sup>-/-</sup> mice on chow was determined by enzymatic assay. *Ube2o*<sup>+/+</sup> *n* = 8, *Ube2o*<sup>+/-</sup> *n* = 5, *Ube2o*<sup>-/-</sup> *n* = 8.

Error bars represent  $\pm$  SEM. *P* value was determined by ANOVA. n.s., non-significant.

\**P*<0.05, \*\**P*<0.01, \*\*\**P*<0.001, *Ube2o*<sup>+/+</sup> vs. *Ube2o*<sup>+/-</sup>; #*P*<0.05, ##*P*<0.01, ###*P*<0.001,

*Ube2o*<sup>+/-</sup> vs. *Ube2o*<sup>-/-</sup>; \$*P*<0.05, \$\$*P*<0.01, \$\$\$*P*<0.001, *Ube2o*<sup>+/+</sup> vs. *Ube2o*<sup>-/-</sup>.

### **Supplemental Figure S2. Haplo-deficiency of *Ube2o* leads to improved insulin sensitivity in diet-induced type 2 diabetes mouse model**

(A) Body weight increase of *Ube2o*<sup>+/+</sup> and *Ube2o*<sup>+/-</sup> mice fed an HFD for 7 weeks.

*Ube2o*<sup>+/+</sup> *n* = 6, *Ube2o*<sup>+/-</sup> *n* = 5.

(B) Blood glucose was measured in  $Ube2o^{+/+}$  and  $Ube2o^{+/-}$  mice on chow or HFD for 7 weeks.  $Ube2o^{+/+}$  chow  $n = 14$ ,  $Ube2o^{+/-}$  chow  $n = 10$ ,  $Ube2o^{+/+}$  HFD  $n = 6$ ,  $Ube2o^{+/-}$  HFD  $n = 6$ .

(C and D) Glucose (C) and insulin (D) tolerance tests in  $Ube2o^{+/+}$  and  $Ube2o^{+/-}$  mice fed either a normal chow or an HFD for 6~7 weeks. Right graphs indicate the area under the curve (AUC) (C) and the area above the curve (AAC) (D). GTT,  $Ube2o^{+/+}$  chow  $n = 14$ ,  $Ube2o^{+/-}$  chow  $n = 12$ ,  $Ube2o^{+/+}$  6 weeks HFD  $n = 12$ ,  $Ube2o^{+/-}$  6 weeks HFD  $n = 11$ ; ITT,  $Ube2o^{+/+}$  chow  $n = 13$ ,  $Ube2o^{+/-}$  chow  $n = 10$ ,  $Ube2o^{+/+}$  7 weeks HFD  $n = 6$ ,  $Ube2o^{+/-}$  7 weeks HFD  $n = 6$ .

Error bars represent  $\pm$  SEM.  $P$  value was determined by Student's  $t$  test. n.s., non-significant. \* $P < 0.05$ ,  $Ube2o^{+/+}$  chow vs.  $Ube2o^{+/-}$  chow; # $P < 0.05$ , ## $P < 0.01$ ,  $Ube2o^{+/+}$  HFD vs.  $Ube2o^{+/-}$  HFD.

### Supplemental Figure S3. Generation of skeletal muscle-, adipose- or liver-specific *Ube2o* knockout mice

(A) Schematic presentation of targeted alleles of *Ube2o* before and after recombination. PCR primers for genotyping are indicated by arrowheads. LA, long arm; SA, short arm;  $Ube2o^{fl-neo}$ , *Ube2o* targeted allele;  $Ube2o^{fl}$ , *Ube2o* allele after recombination by FLP;  $Ube2o^{\Delta}$ , *Ube2o* allele after recombination by Cre.

(B) PCR genotyping of tail biopsies from an intercross of  $Ube2o^{fl/+}$  mice.

(C) Lysates from skeletal muscle and adipose tissue of 10-week-old control ( $Ube2o^{fl/fl}$ ) and  $Ube2o^{\Delta Adip}$  mice or 12-week-old control and  $Ube2o^{\Delta Mus}$  mice were subjected to immunoblotting.

**Supplemental Figure S4. Insulin signaling in liver or visceral fat in  $Ube2o^{\Delta Mus}$  mice on HFD is not enhanced before the onset of obesity**

(A) Adipose depot weight of control ( $Ube2o^{fl/fl}$ ) and  $Ube2o^{\Delta Mus}$  mice on HFD for 20 weeks. SAT, subcutaneous adipose tissue; VAT, visceral adipose tissue; BAT, brown adipose tissue.  $n = 7$ .

(B) Muscle tissue weight of control and  $Ube2o^{\Delta Mus}$  mice on chow. Gastroc., gastrocnemius muscle; Soleus, soleus muscle; TA, tibialis anterior muscle.  $n = 7$ .

(C) H&E-stained sections of tibialis anterior muscle of control and  $Ube2o^{\Delta Mus}$  mice on chow. Scale bars, 50  $\mu$ m.

(D and E) Immunoblots showing insulin (200 nM)-induced S473 phosphorylation of AKT protein and its total protein levels in the visceral adipose tissue (VAT) (D) and liver (E) from control and  $Ube2o^{\Delta Mus}$  mice on the HFD for 7 weeks.  $n = 4$ .

Error bars represent  $\pm$  SEM.  $P$  value was determined by Student's  $t$  test (\*\* $P < 0.01$ ).

**Supplemental Figure S5. Liver-specific  $Ube2o$  knockout mice do not have improved glucose and lipid metabolism on in response to HFD.**

(A) Body weights of control ( $Ube2o^{fl/fl}$ ) and  $Ube2o^{\Delta Liv}$  mice fed an HFD for 17 weeks.  $n = 8$ .

(B) Plasmatic levels of total cholesterol (TC) (mg/dl) of control and  $Ube2o^{\Delta Liv}$  mice on HFD for 17 weeks.  $Ube2o^{fl/fl}$   $n = 8$ ,  $Ube2o^{\Delta Liv}$   $n = 6$ .

(C) Liver weight of control and  $Ube2o^{\Delta Liv}$  mice on HFD for 17 weeks.  $n = 8$ .

(D) Hepatic triglyceride (TG) level per g of liver of control and  $Ube2o^{\Delta Liv}$  mice on HFD

for 17 weeks.  $n = 8$ .

(E) Blood glucose was measured control and  $Ube2o^{\Delta Liv}$  mice on HFD for 17 weeks.

$Ube2o^{fl/fl}$   $n = 7$ ,  $Ube2o^{\Delta Liv}$   $n = 8$ .

(F and G) Glucose (GTT) (F) and insulin (ITT) (G) tolerance tests in control and

$Ube2o^{\Delta Liv}$  mice on HFD for 14~15 weeks. Insets indicate the area under the curve

(AUC) (F) and the area above the curve (AAC) (G).  $Ube2o^{fl/fl}$   $n = 10$ ,  $Ube2o^{\Delta Liv}$   $n = 8$ .

(H) Immunoblots showing insulin (200 nM)–induced tyrosine phosphorylation of IRS1

immunoprecipitates and S473 phosphorylation of AKT protein and their total protein

levels in liver from control and  $Ube2o^{\Delta Liv}$  mice on HFD for 17 weeks.  $n = 4$ .

Error bars represent  $\pm$  SEM.  $P$  value was determined by Student's  $t$  test (n.s., non-significant).

### **Supplemental Figure S6. UBE2O regulates metabolic adaptation to energy stress through AMPK $\alpha$ 2.**

(A) Fatty acid oxidation (FAO) was determined by measuring  $^{14}CO_2$  and [ $^{14}C$ ]ASM produced in C2C12 myotubes expressing  $Ube2o$  shRNA together with  $Prkaa2$  shRNA treated with vehicle or etomoxir incubated with [ $1-^{14}C$ ] palmitate for 3 hours.  $n = 6$ .

(B) Basal oxygen consumption rate (OCR) from (a) was measured with a Seahorse XFe96 extracellular flux analyzer.  $n = 8$ .

(C) Total RNAs from C2C12 myotubes expressing  $Ube2o$  shRNA together with  $Prkaa2$  shRNA were subjected to RT-qPCR for  $Ppargc1a$  and its target genes.  $n = 3$ .

(D–F) C2C12 myotubes ectopically expressing UBE2O were incubated in glucose-free medium for 4 hours. The NADP $^+$ /NADPH ratio (D), GSSG/GSH ratio (E) and ROS level

(F) were then determined. GSSG, oxidized glutathione; GSH, reduced glutathione.

$n = 4$ .

(G–I) C2C12 myotubes expressing Ube2o shRNA together with Prkaa2 shRNA were incubated in glucose-free medium for 4 hours. The NADP<sup>+</sup>/NADPH ratio (G),

GSSG/GSH ratio (H) and ROS level (I) were then determined.  $n = 3$ .

Error bars represent  $\pm$  SEM.  $P$  value was determined by ANOVA (n.s., non-significant;

\*.# $P < 0.05$ ; \*\*.#.# $P < 0.01$ ; \*\*\*.#.#.# $P < 0.001$ ).

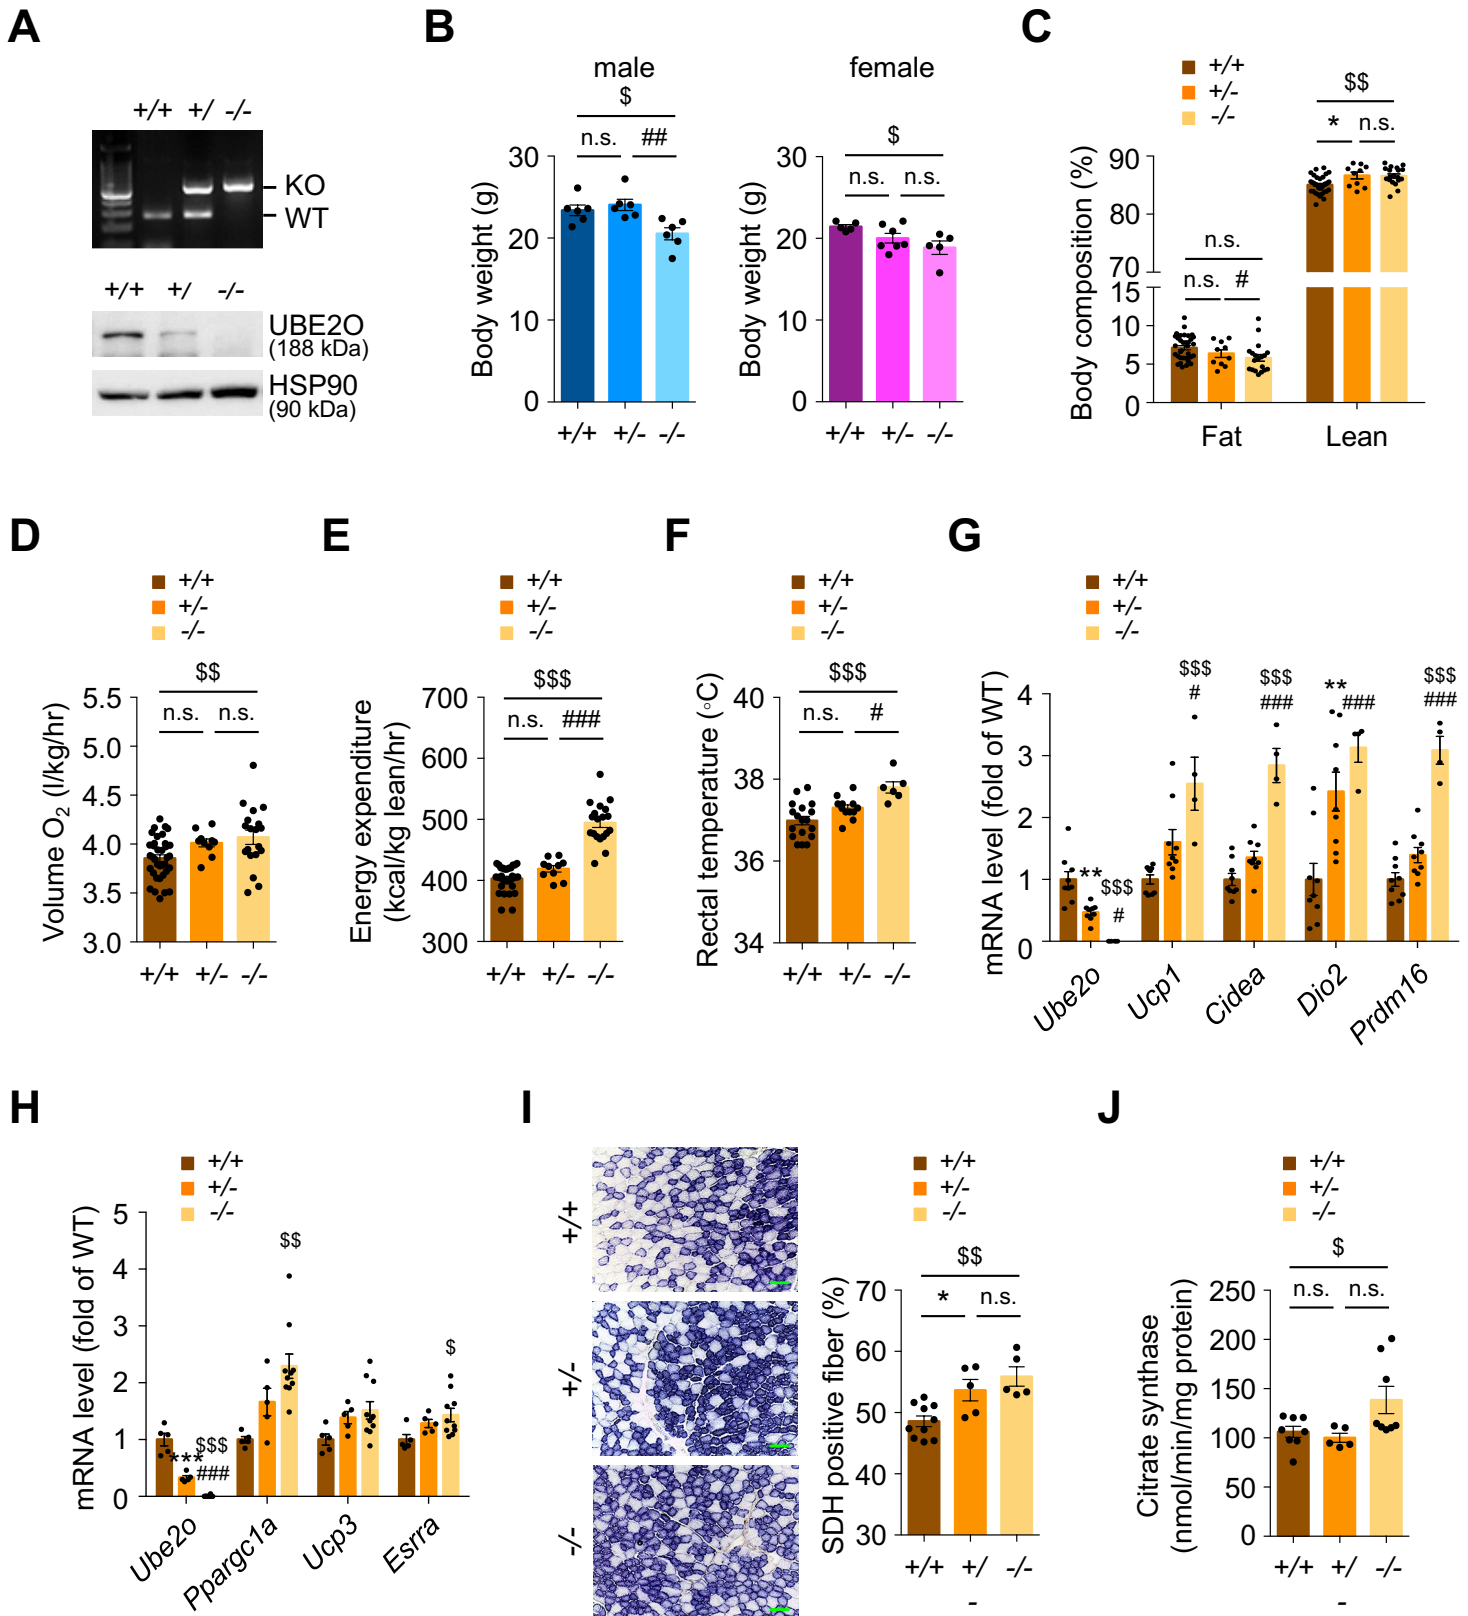

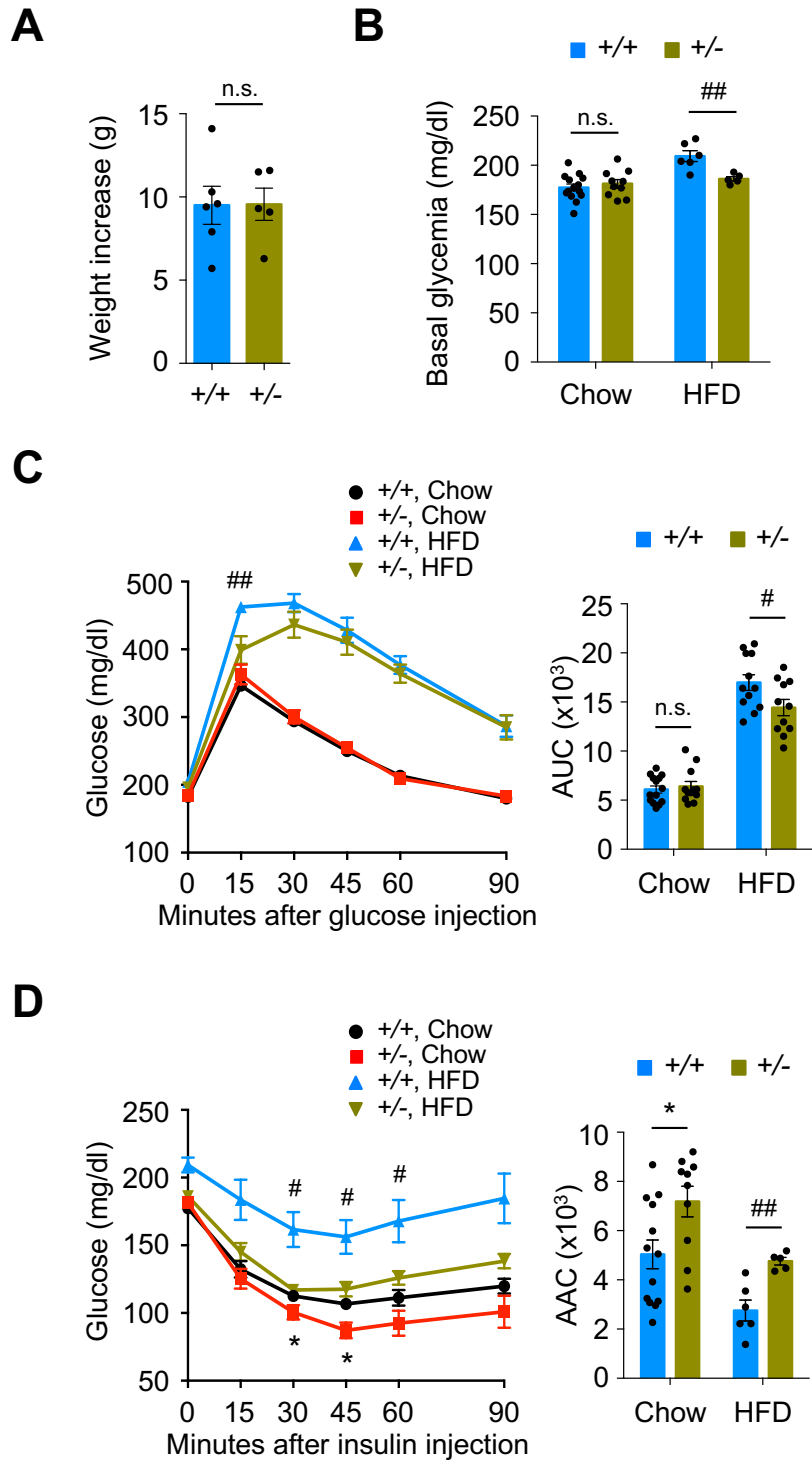

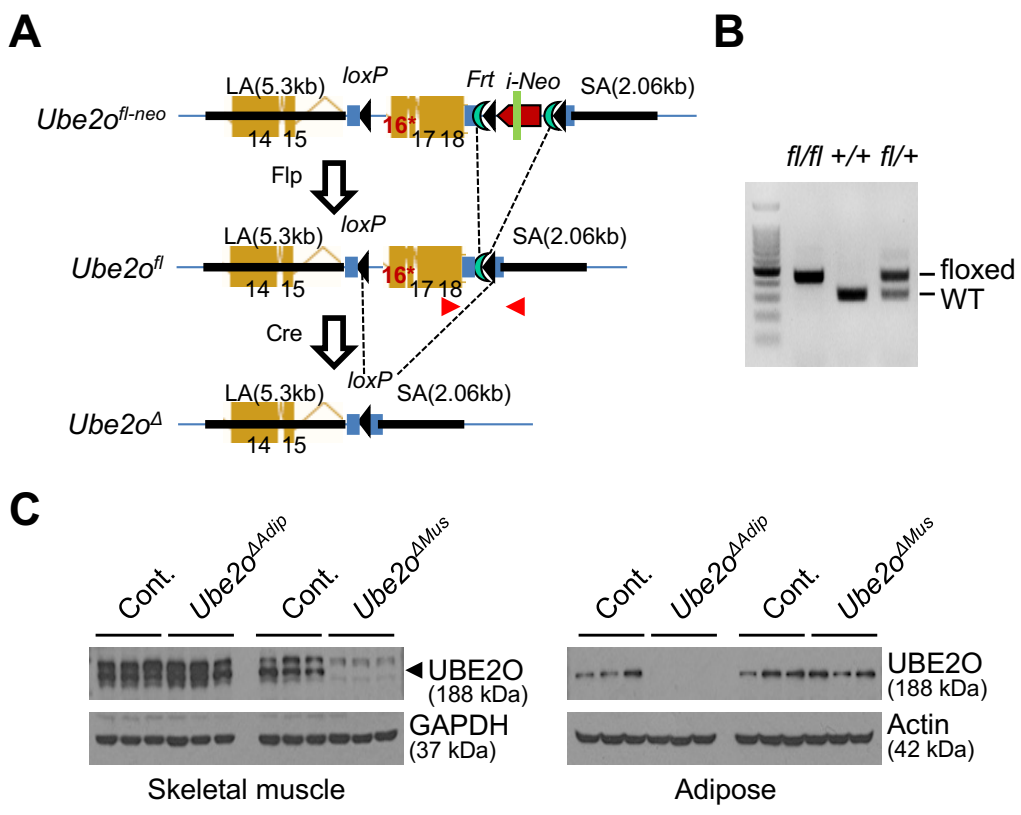

**A**

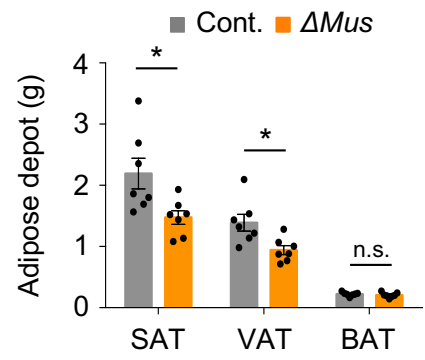

**B**

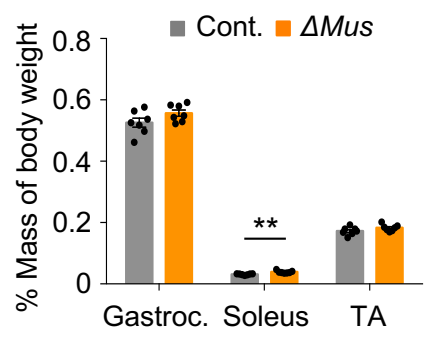

**C**

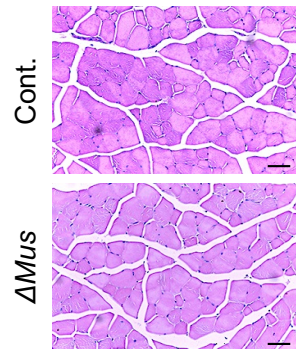

**D**

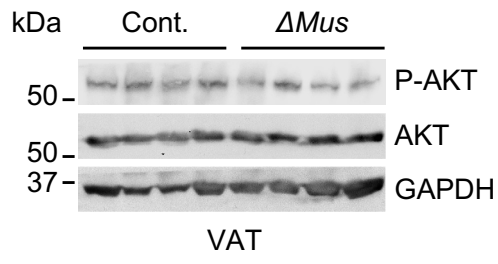

**E**

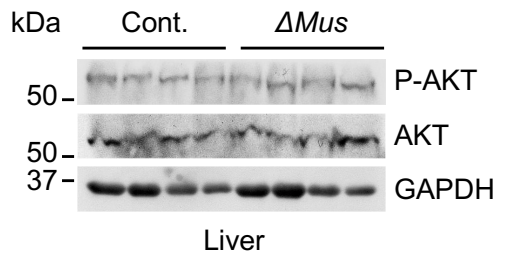

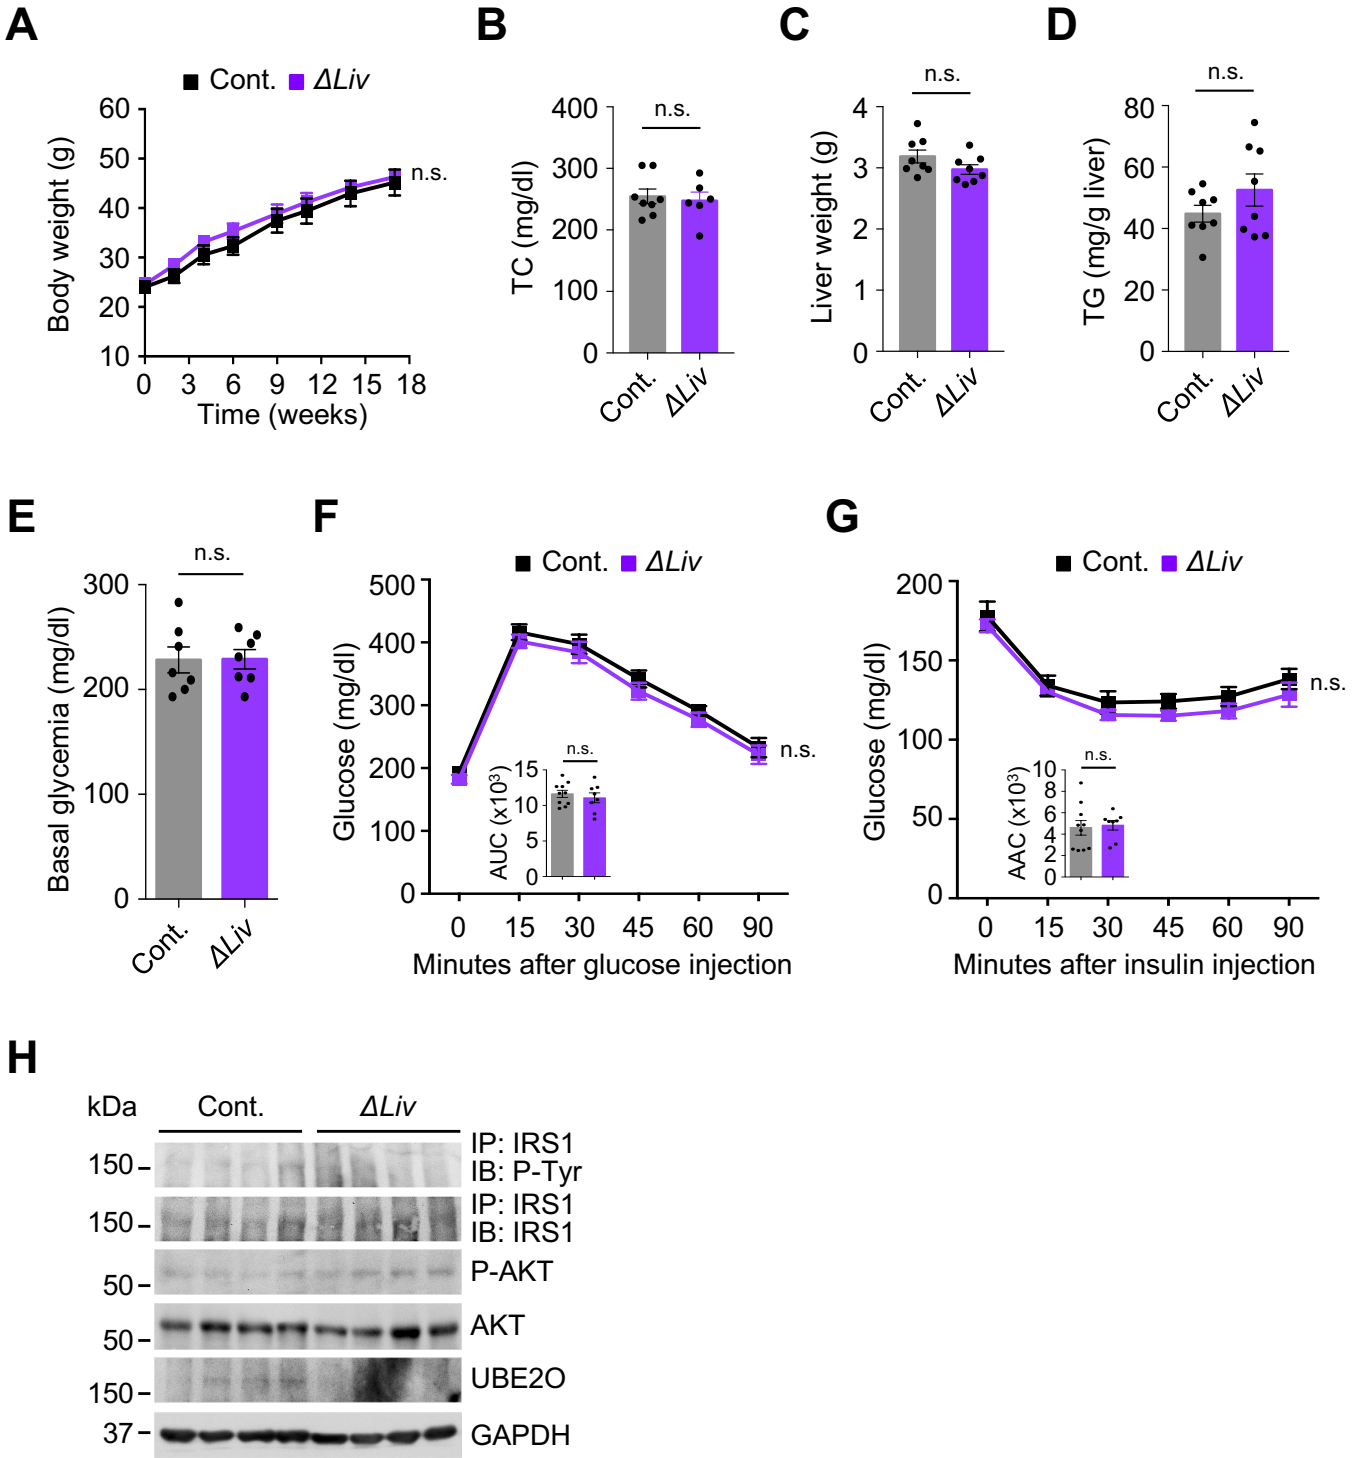

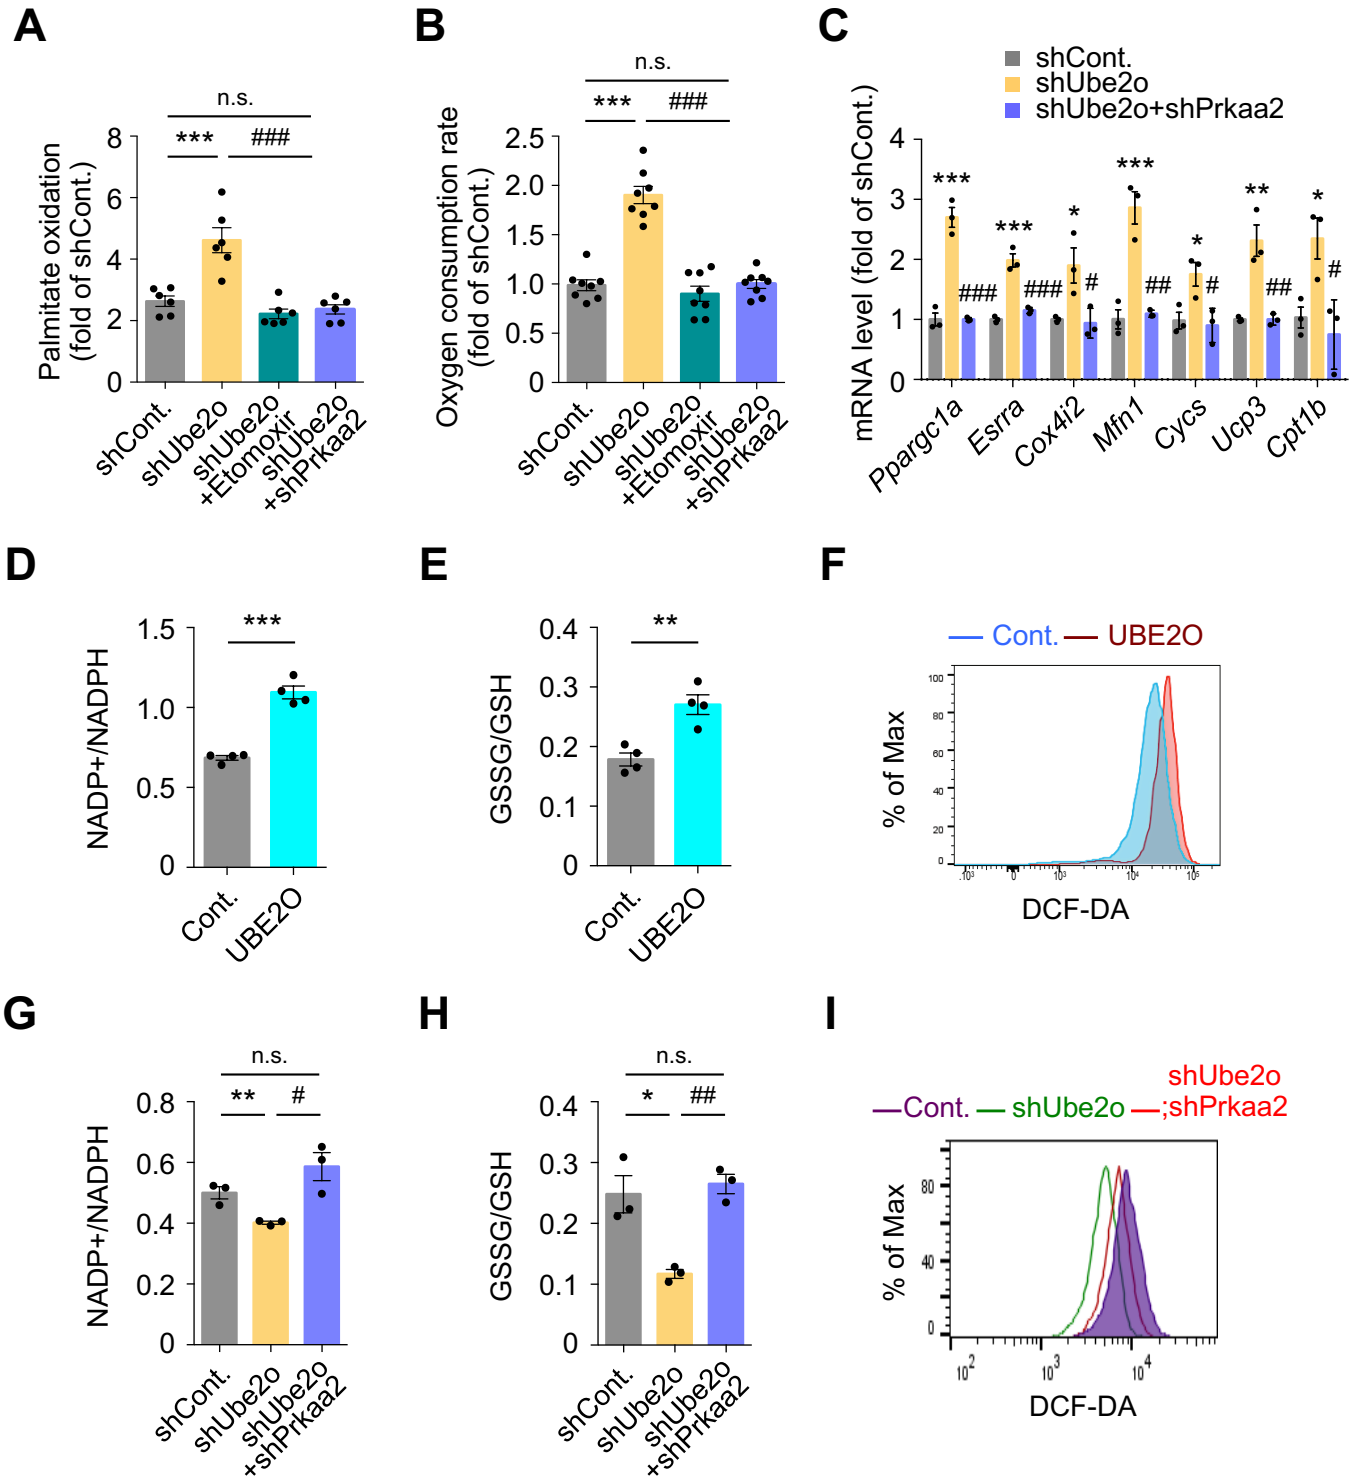

Figure 1C

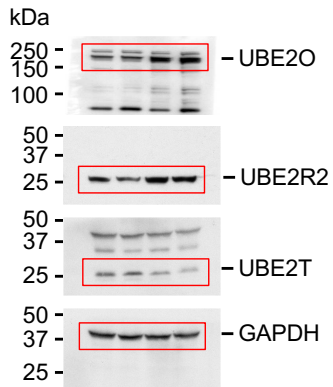

Figure 1D

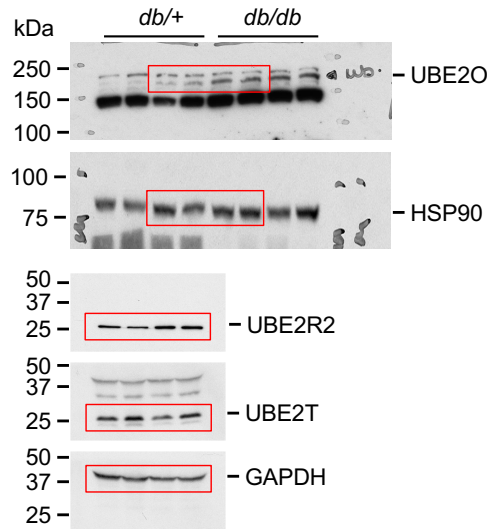

Figure 3H

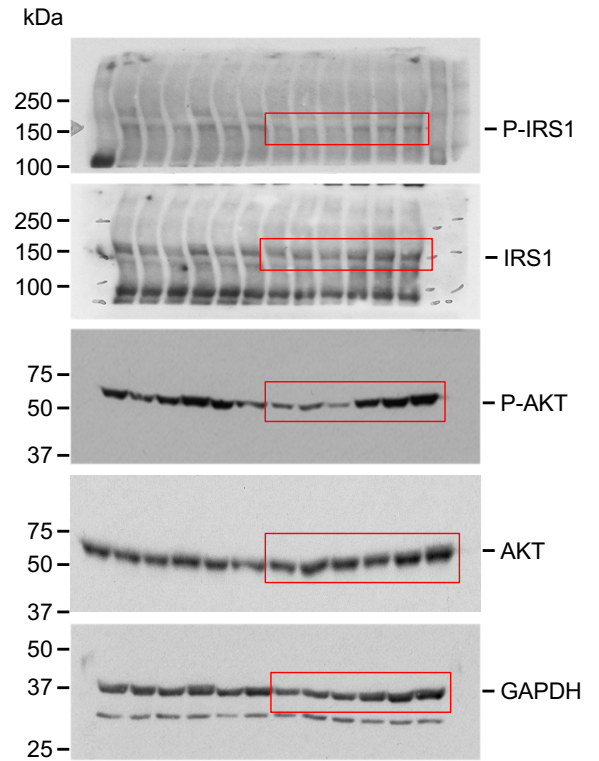

Figure 4Q

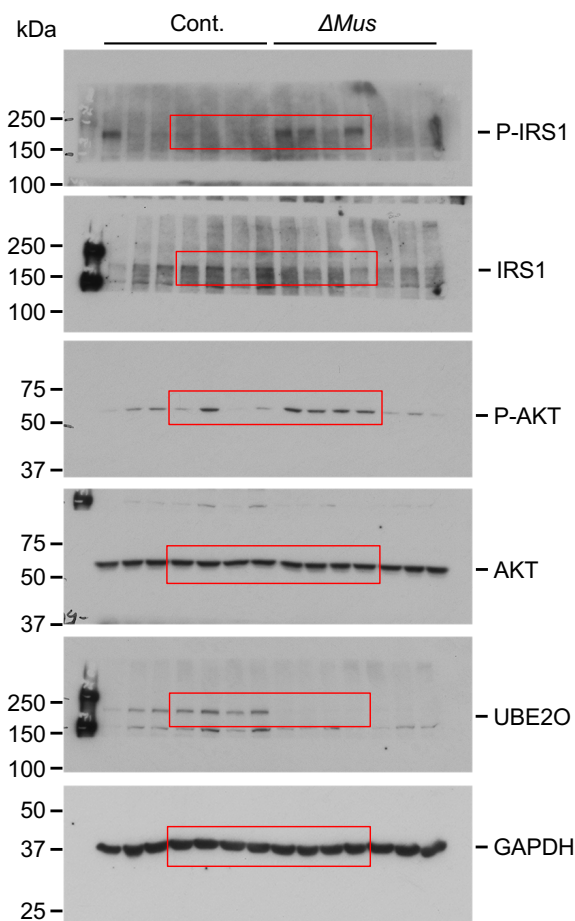

Figure 5J

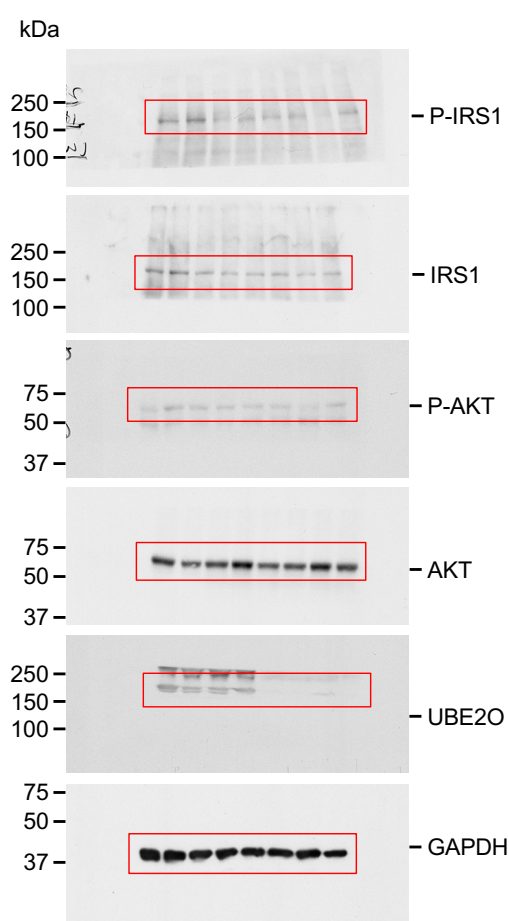

Figure 6A

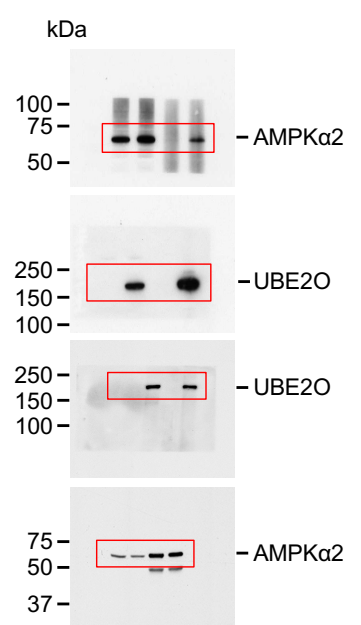

Figure 6B

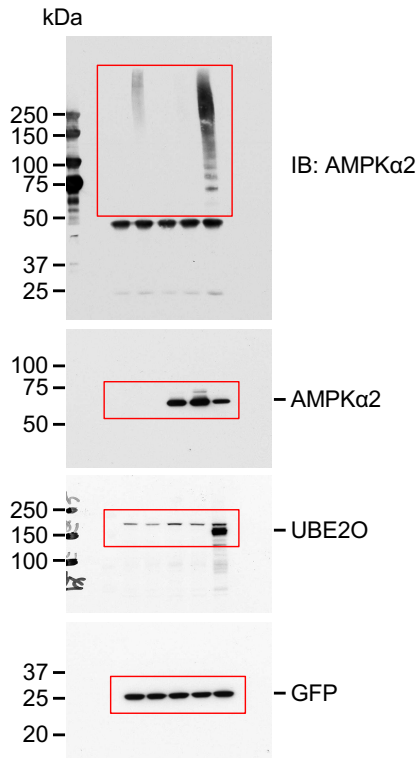

Figure 6C

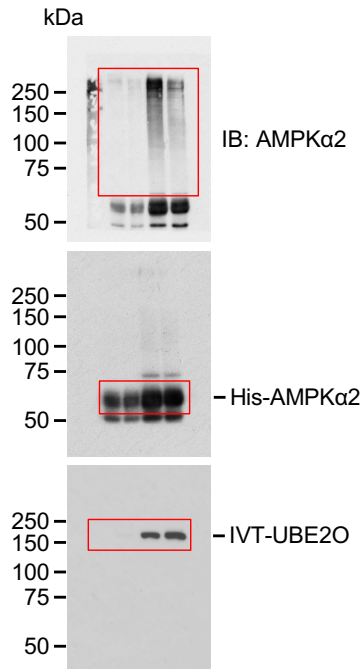

Figure 6D

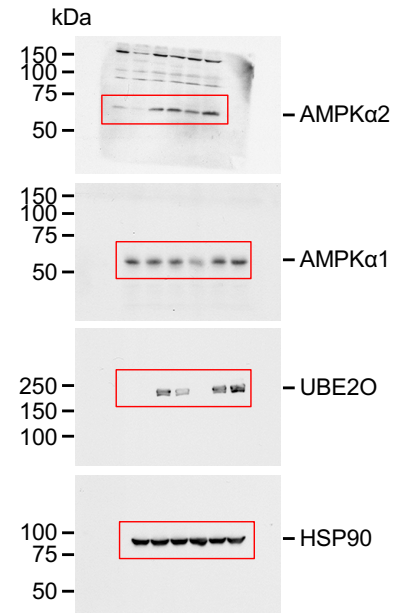

Figure 6E

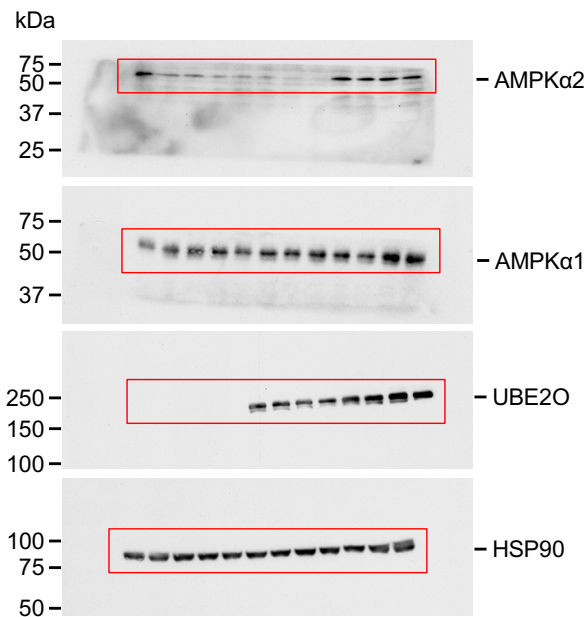

Figure 6F

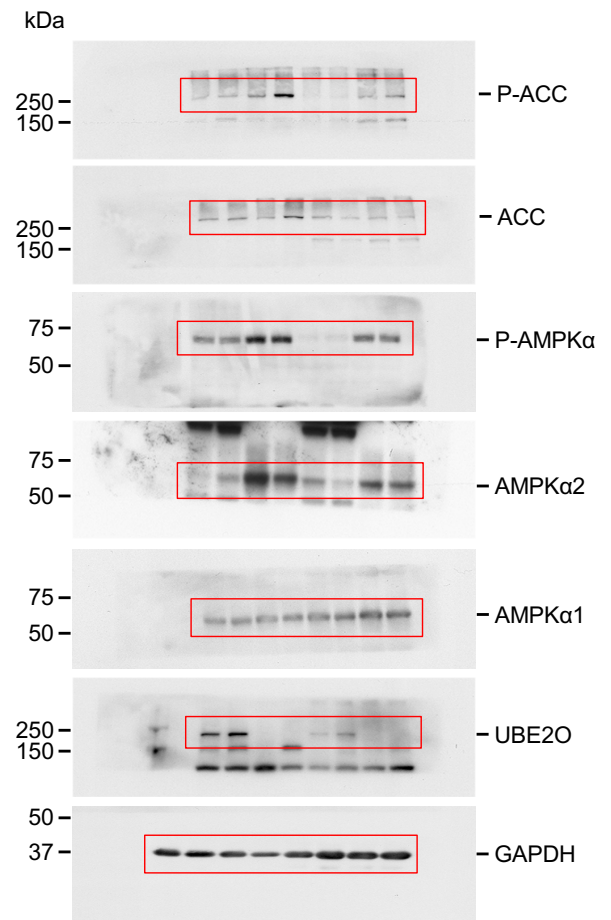

Figure 6G

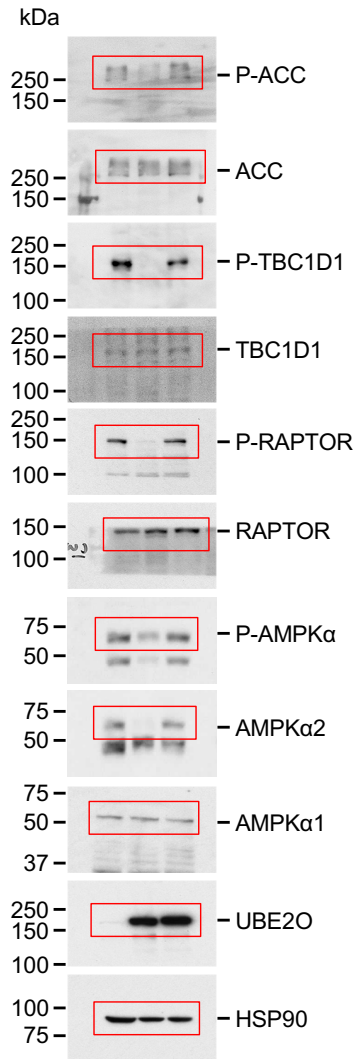

Figure 6I

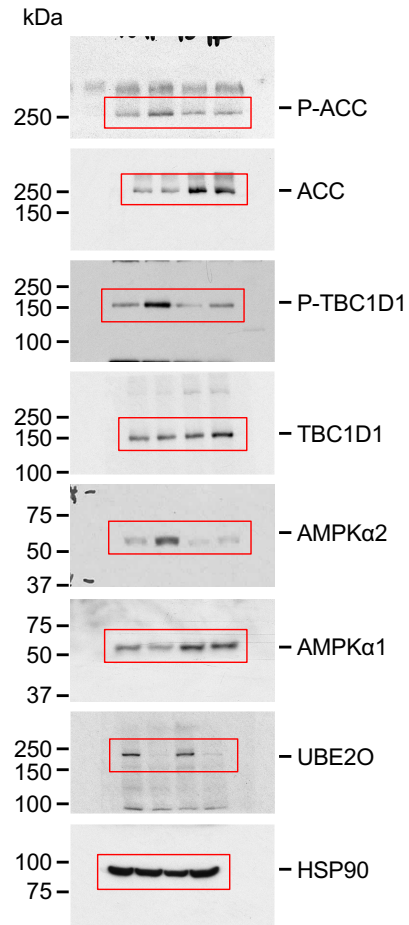

Figure 7I

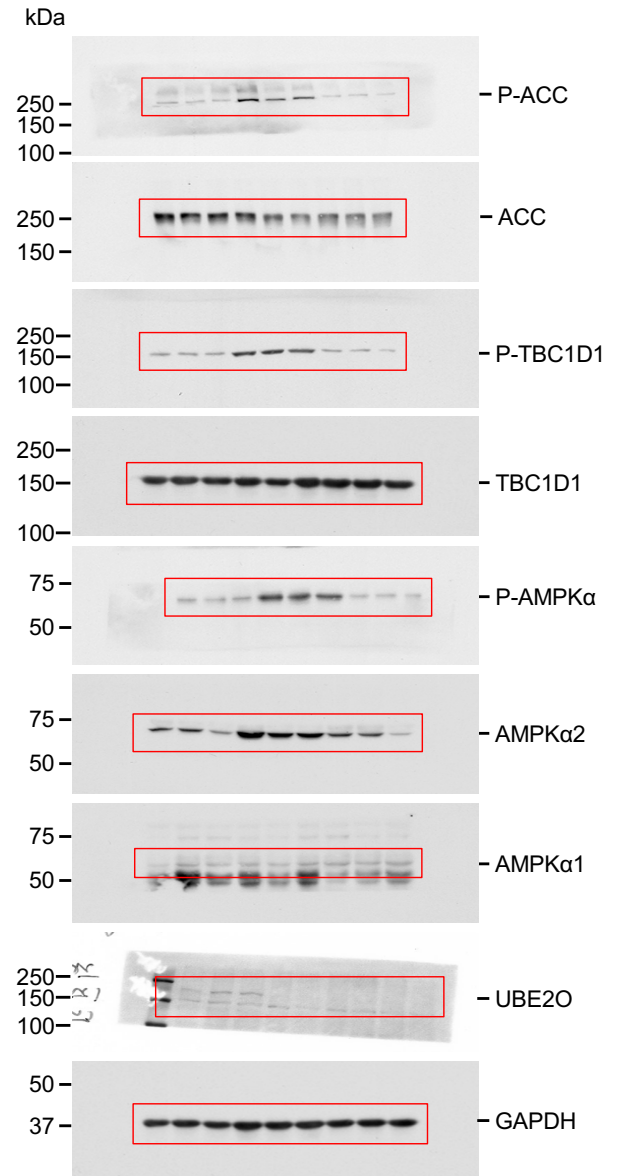

Supplemental Figure 1A

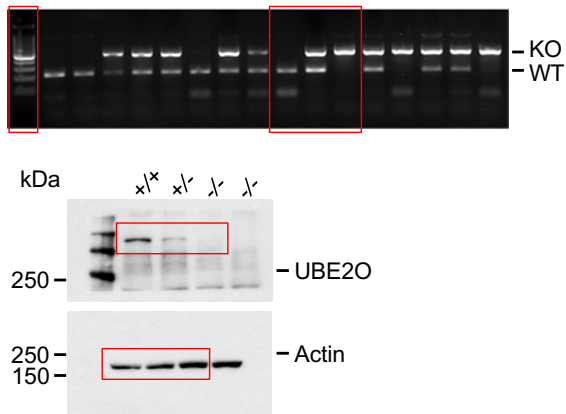

Supplemental Figure 3C

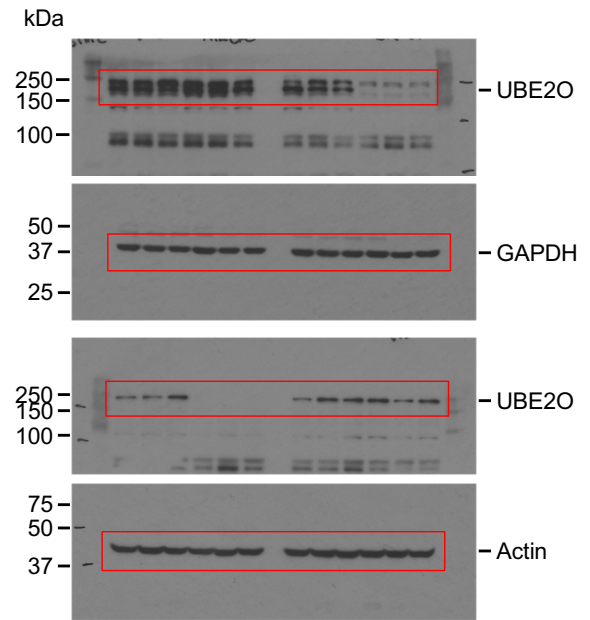

Supplemental Figure 3B

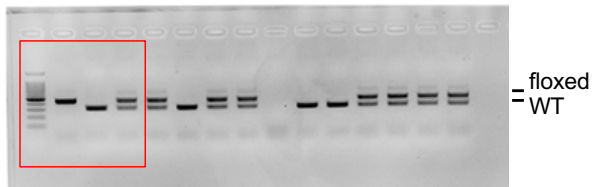

Supplemental Figure 4D

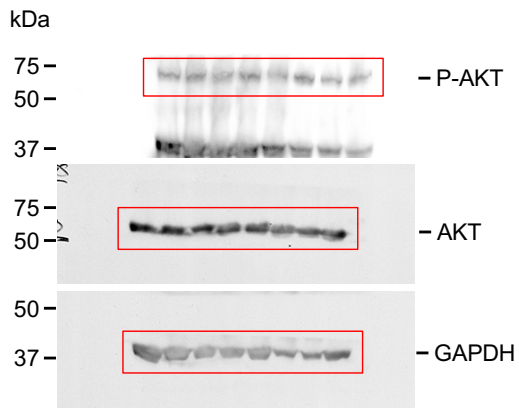

Supplemental Figure 4E

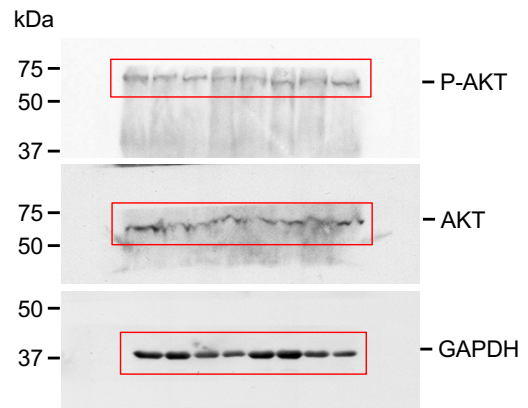

Supplemental Figure 5J

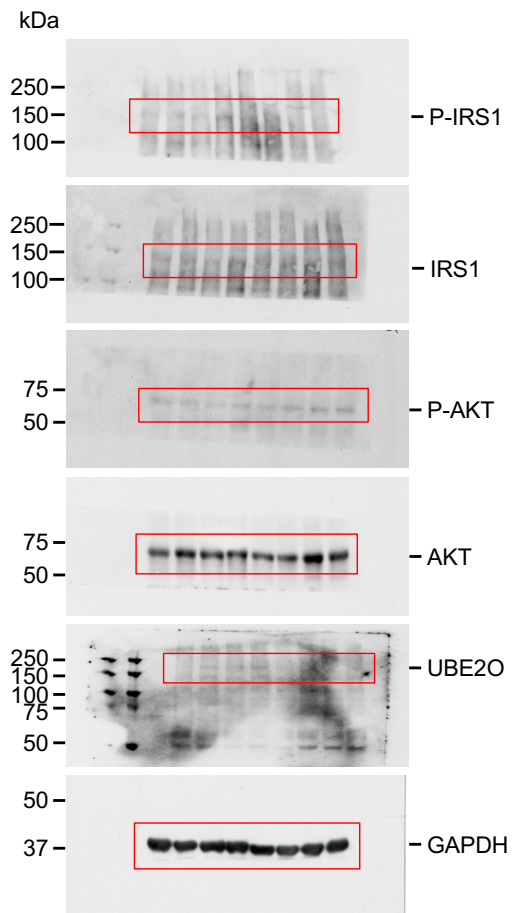

Supplement: sd1 [file 1]
